# Supplementary material
Source: PubMed Central journal article supplement (PMC3654808)
Supplement: NIHMS460061-supplement-Supplementary_Figures___Tables.pdf [file NIHMS460061-supplement-Supplementary_Figures___Tables.pdf]

## **Supplementary Information (1 PDF file)**

### **Identification of Recurrent *NAB2-STAT6* Gene Fusions in Solitary Fibrous Tumor by Integrative Sequencing**

Dan R. Robinson, Yi-Mi Wu, Shanker Kalyana-Sundaram, Xuhong Cao, Robert J. Lonigro, Yun-Shao Sung, Chun-Liang Chen, Lei Zhang, Rui Wang, Fengyun Su, Matthew K. Iyer, Sameek Roychowdhury, Javed Siddiqui, Kenneth J. Pienta, Lakshmi P. Kunju, Moshe Talpaz, Juan Miguel Mosquera, Samuel Singer, Scott M. Schuetze, Cristina R. Antonescu, Arul M. Chinnaiyan

This file contains Supplementary Figures 1-10 with legends and Supplementary Tables 1-8.

**a**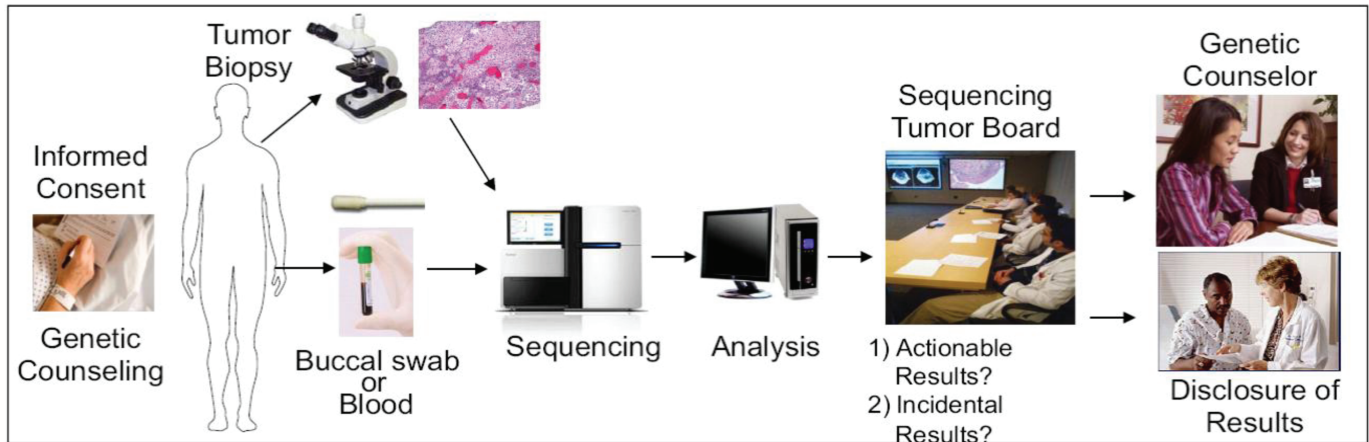**b**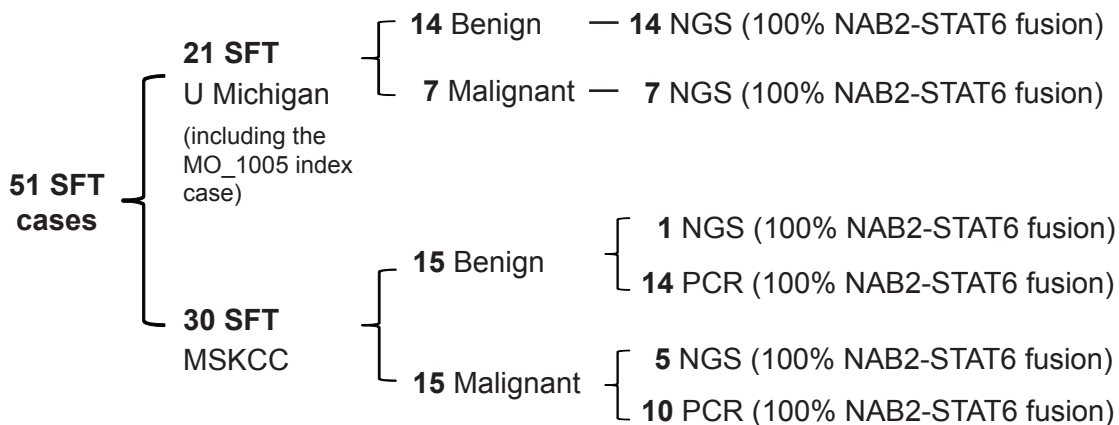

**Supplementary Figure 1. a.** A schematic of the workflow for the clinical sequencing protocol (MI-ONCOSEQ) in which the index patient (MO\_1005) was enrolled. Patients in this protocol meet with a genetic counselor and provide written informed consent. A sample of their normal tissue (i.e. blood or buccal swab) is obtained for germline studies. A CT-guided biopsy is employed to obtain tumor specimens. The samples are subjected to integrative sequencing and analyzed for mutations. Each patient is then presented at a multi-disciplinary Sequencing Tumor Board in which “actionable” and/or “informative” mutations are deliberated upon. This information can then be transmitted back to the patient and primary oncologist. **b.** Summary of the SFT cases analyzed in this study. In total, 51 SFT samples were analyzed, including 29 benign and 22 malignant. Among these samples, 27 underwent RNA sequencing and 24 were screened by RT-PCR for recurrent *NAB2-STAT6* fusions. MSKCC, Memorial Sloan-Kettering Cancer Center. NGS, next-generation sequencing (transcriptome sequencing). PCR, RT-PCR screening.

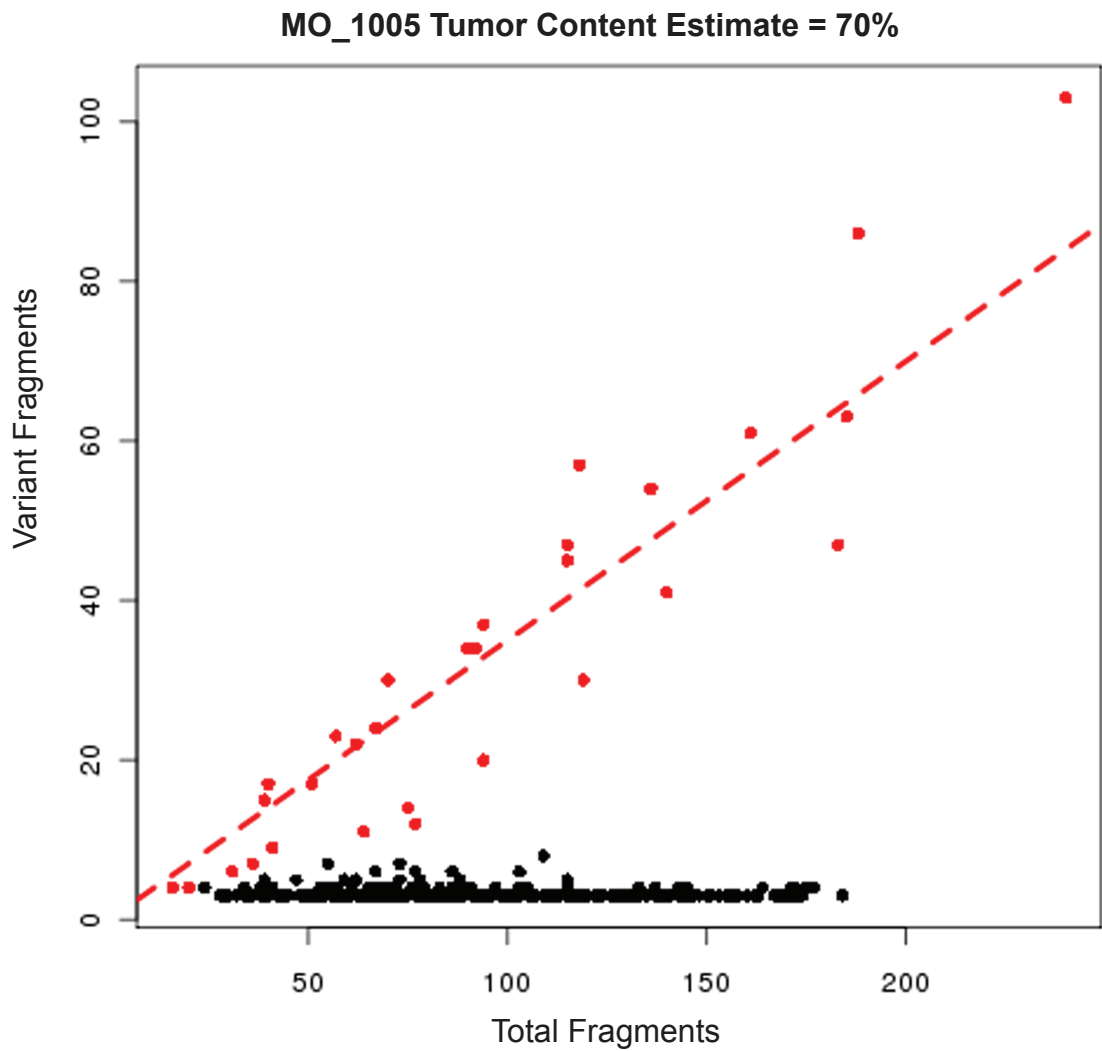

**Supplementary Figure 2.** Tumor content of index case MO\_1005. Tumor content was estimated from the sequence data by fitting a binomial mixture model with two components to the set of most likely SNV candidates on 2-copy genomic regions. Details of data analysis were described in the Methods section.

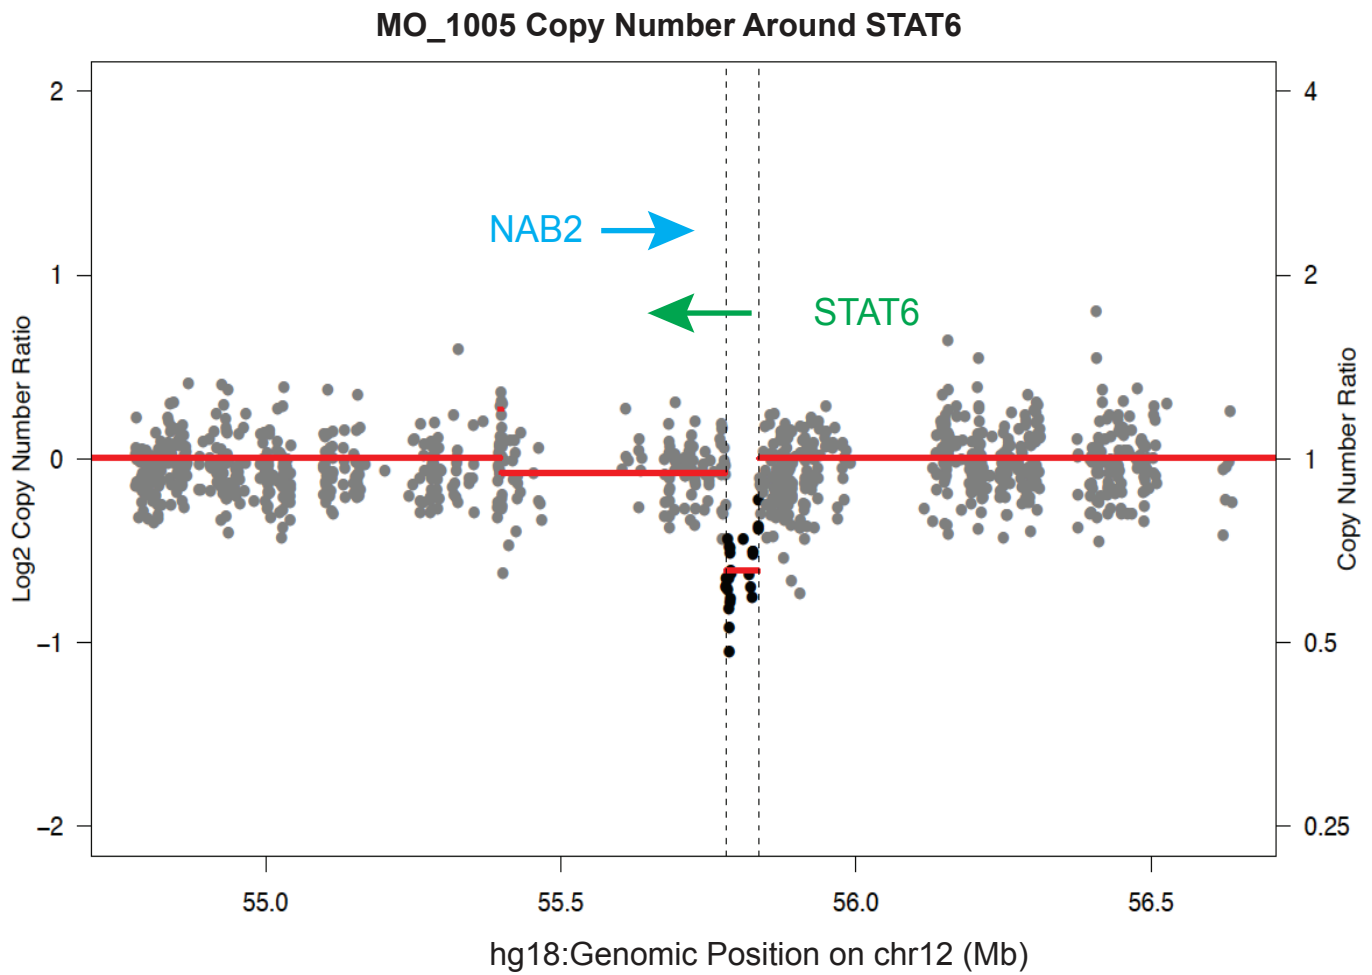

**Supplementary Figure 3.** Copy number changes around *STAT6* gene in MO\_1005. Copy number aberrations were quantified and reported for each gene as the segmented normalized log<sub>2</sub>-transformed exon coverage ratios between each tumor sample and matched normal sample.

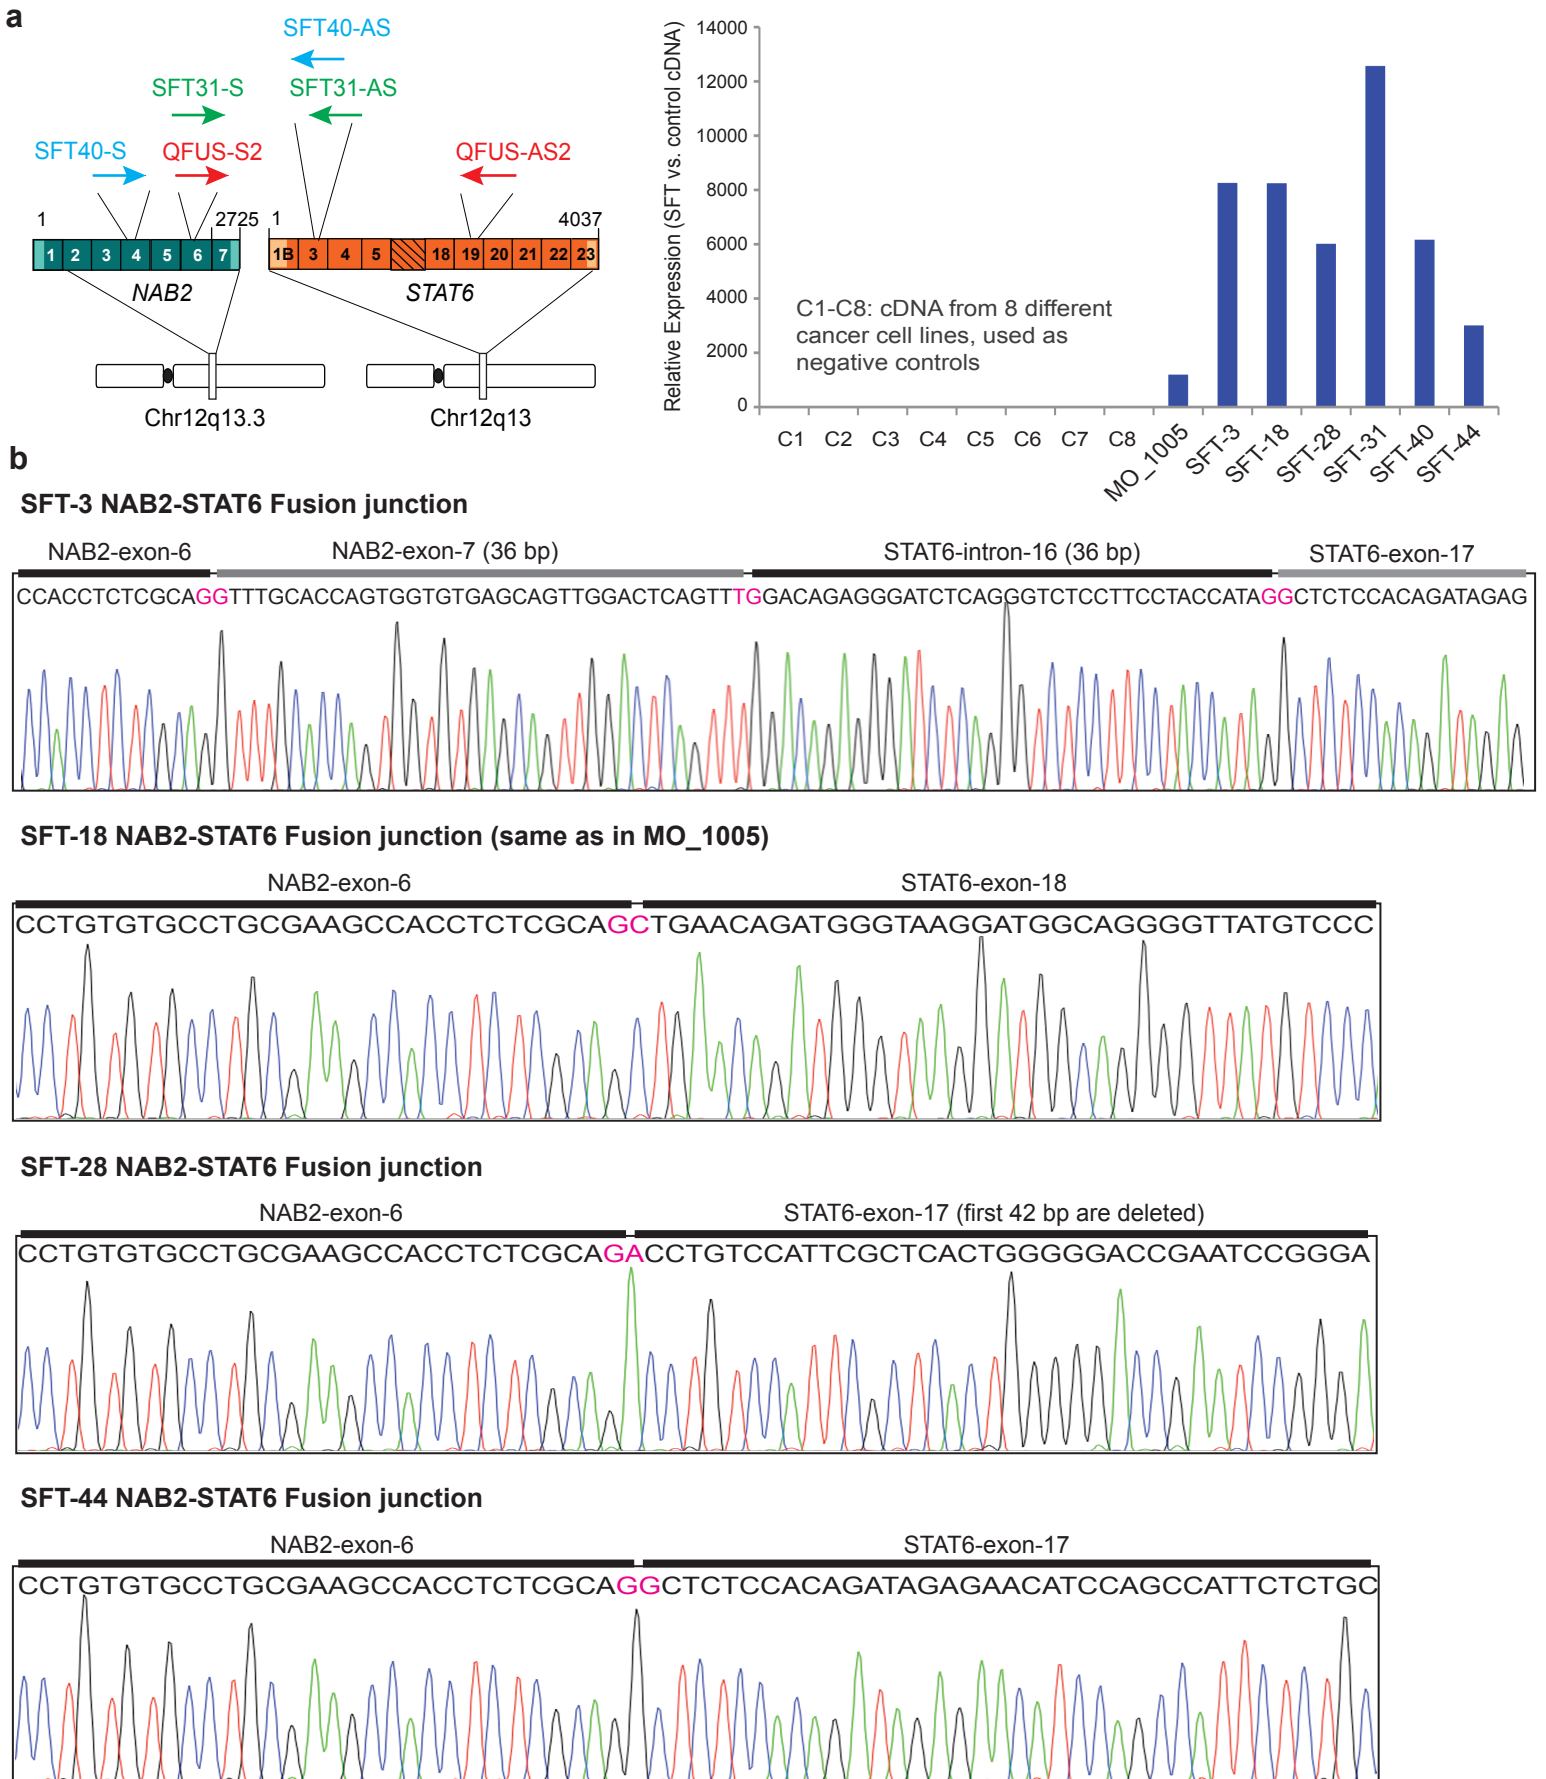

**Supplementary Figure 4. a.** Validation of *NAB2-STAT6* fusions in SFT samples by quantitative RT-PCR. **A.** The locations of PCR primer pairs are shown on the left. The relative expression levels of *NAB2-STAT6* fusions in SFT samples in comparison to control cDNAs are shown on the right. **b.** Sequences across *NAB2-STAT6* fusion junctions in SFT samples. PCR products generated by the same pairs of primers as in A (agarose gel image in Figure 2A) were sequenced and representative chromatograms of fusion junctions are shown.

NAB2, 212803\_s\_at

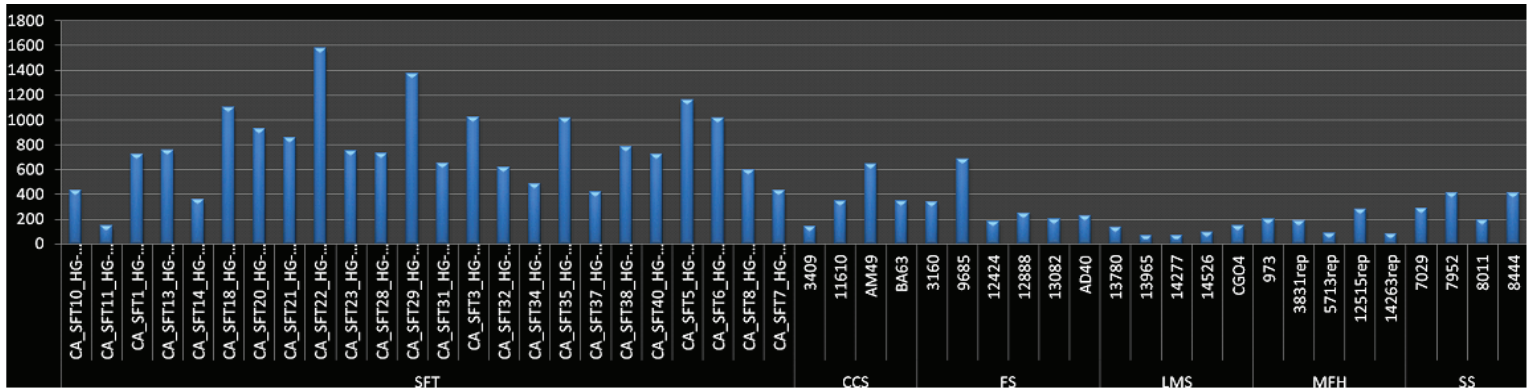

STAT6, 201331\_s\_at

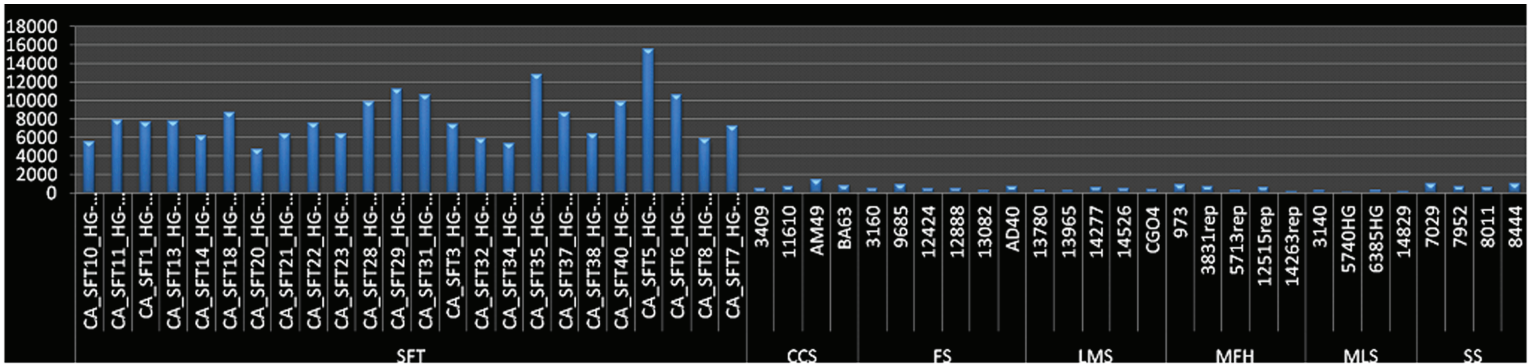

**Supplementary Figure 5.** Relative expression of *NAB2* and *STAT6* in SFT tumors as measured by Affymetrix U133A microarray analysis across a panel of soft tissue sarcomas. SFT, solitary fibrous tumor; CCS, clear cell sarcoma; FS, fibrosarcoma; LMS, leiomyosarcoma; MFH, malignant fibrous histiocytoma; MLS, myxoid liposarcoma; SS, synovial sarcoma.

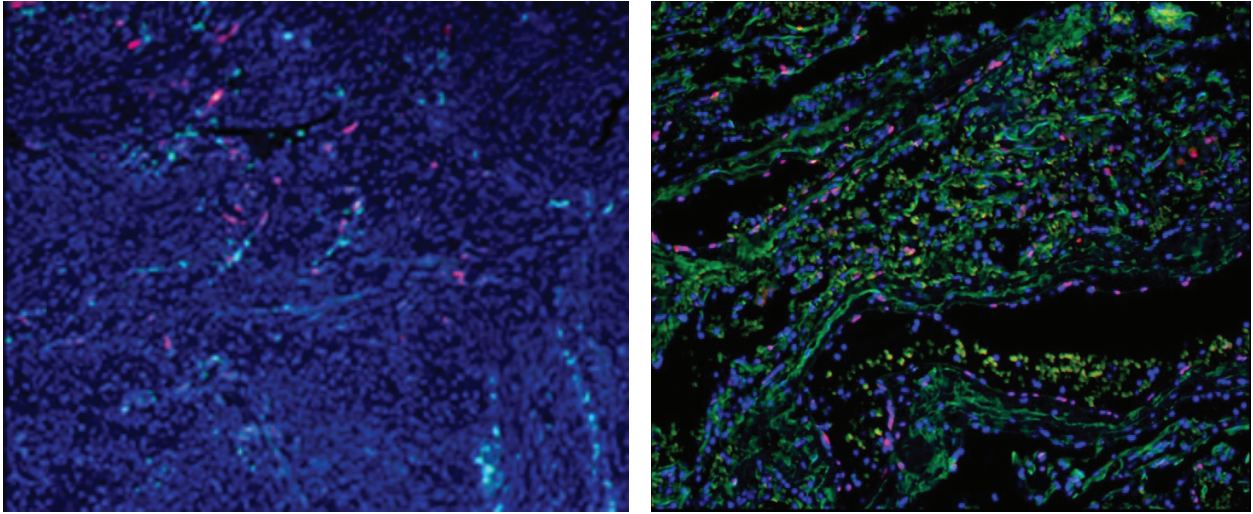

**Supplementary Figure 6.** Immunofluorescence staining of phosphorylated STAT6. Immunostaining using antibodies against the phospho-STAT6 Y641 showed negative expression in the SFT tumors tested (a representative image of SFT-14 shown on the left; negative nuclei noted by the DAPI blue color), while nuclear expression of phosphorylated STAT6 was detected in the entrapped endothelial cells (left panel) or adjacent lung parenchyma (right panel; positive nuclei highlighted in pink).

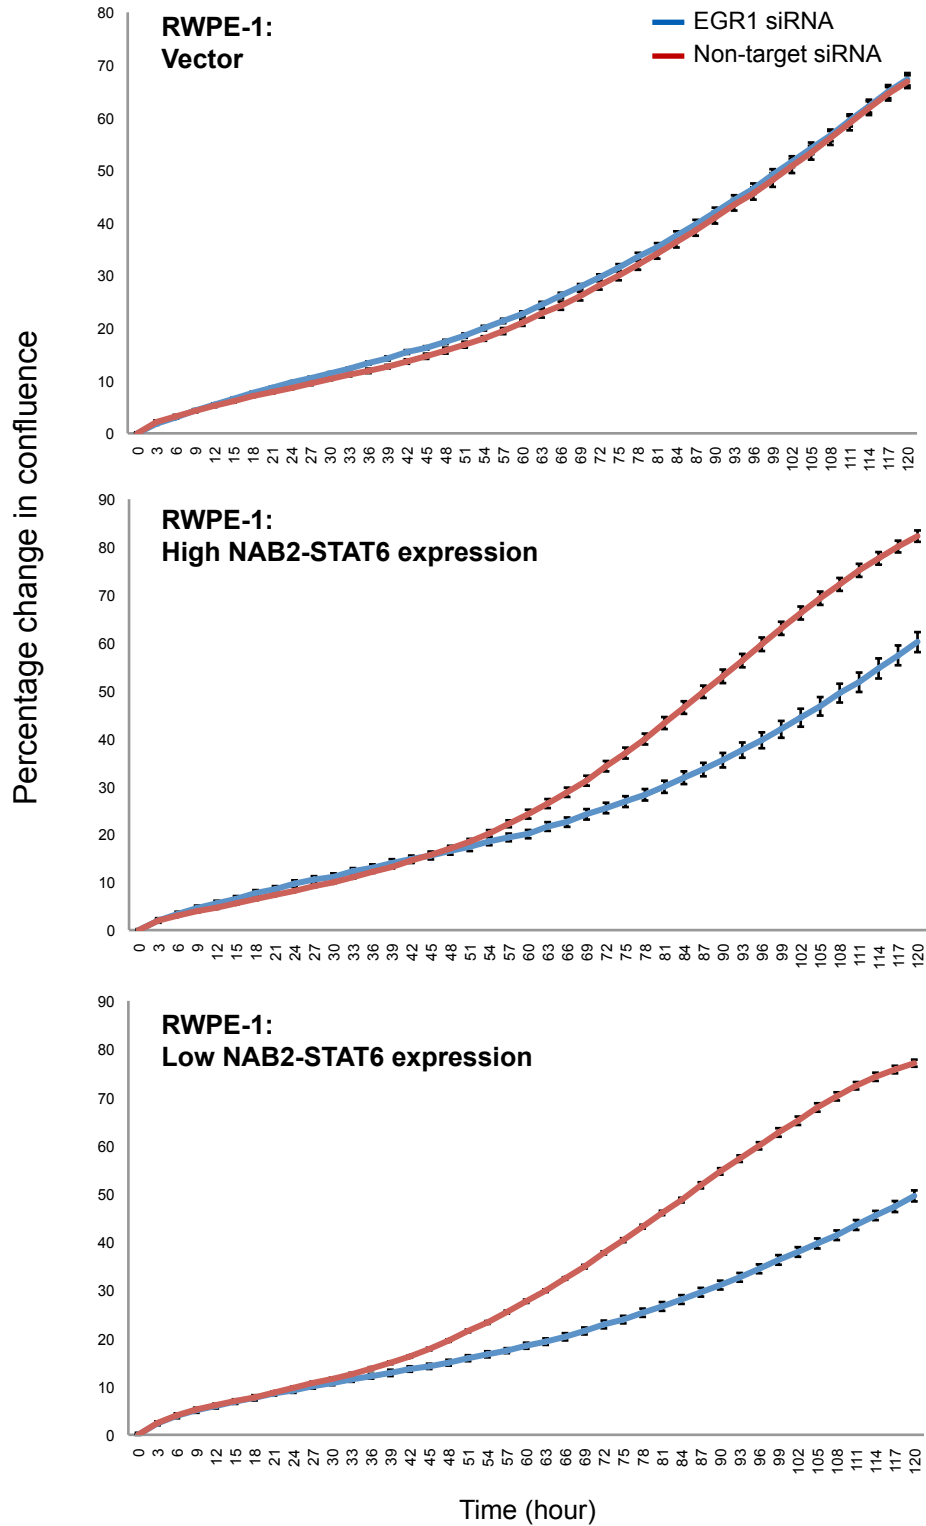

**Supplementary Figure 7.** SiRNA targeting *EGR1* effectively decreases cell proliferation of RWPE-1 cells stably expressing NAB2-STAT6 fusion proteins. RWPE-1 stables lines were transfected twice with siRNA targeting *EGR1* or non-targeting siRNA. After 24 hrs, cells were plated at equal confluence in 24-well dishes and proliferation was analyzed using the live-cell imaging Incucyte Analyzer.



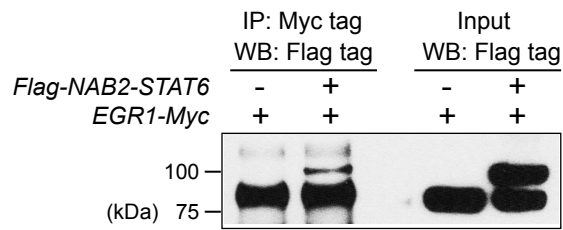

**Supplementary Figure 8.** Physical interaction of EGR1 and NAB2-STAT6 fusion proteins. 293T cells were transfected with myc-tagged EGR1 alone or co-transfected with myc-tagged EGR1 and Flag-tagged NAB2-STAT6. After 24 hrs, nuclear lysates were immunoprecipitated with anti-myc tag antibody, followed by Western blotting with anti-Flag antibody. The size and expression level of the Flag-NAB2-STAT6 fusion protein in total nuclear lysate was shown on the right (1/10th the IP amount).

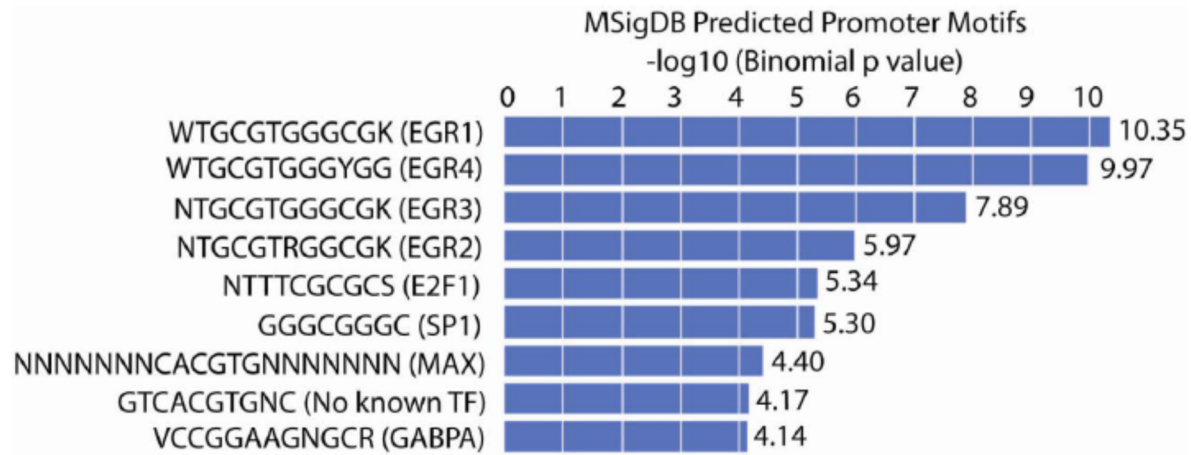

**Supplementary Figure 9.** K562 EGR1 ChIP-SEQ dataset (GSM803414) peak-to-gene mappings are highly enriched for EGR1 target genes. The bar plot shows the base 10 logarithm of binomial p-value of the enrichment of EGR1 promoter motifs within the DNA sequences comprising the top 5% of predicted EGR1 binding sites. The top four most highly enriched motifs are all of the early growth response family of transcription factors, with EGR1 being the topmost enriched.

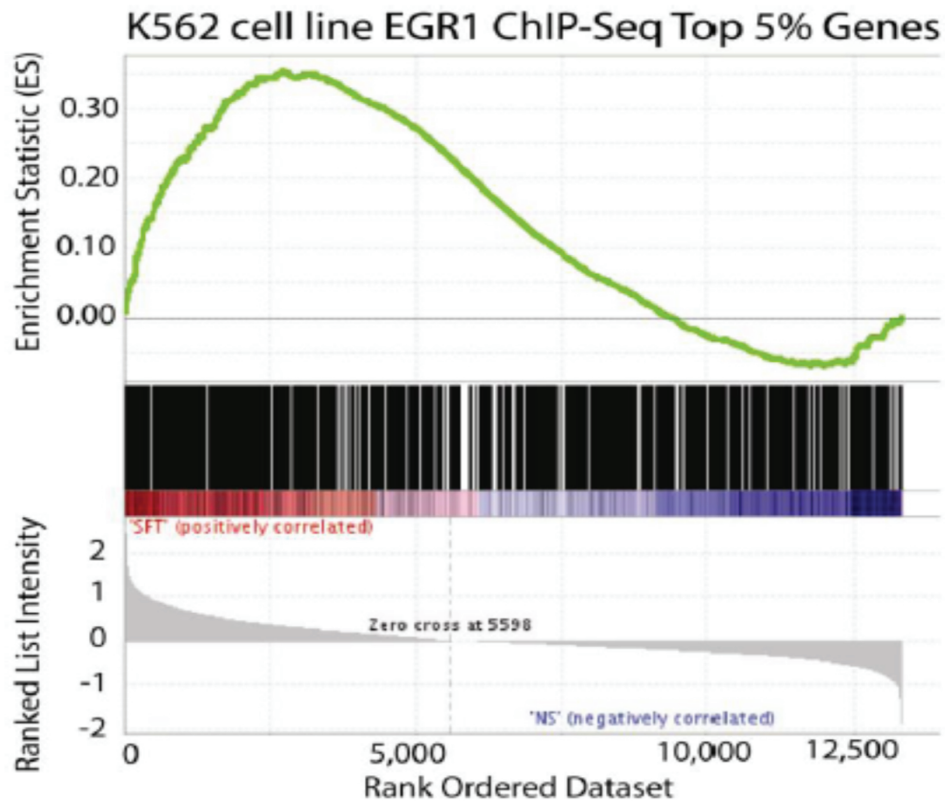

**Supplementary Figure 10.** GSEA analysis of SFT gene expression profiles against EGR1 target genes derived from ChIP-SEQ data. In the upper panel, the Y axis shows the running enrichment score (ES) computed by the GSEA algorithm. The X axis shows genes rank-ordered by the degree of differential expression in SFT compared with non-SFT sarcoma samples. High ranking genes are over-expressed in SFT relative to non-SFT (red) and low ranking genes are over-expressed in non-SFT relative to SFT. The lower panel shows the intensity of the differential expression of each gene computed by the Signal2Noise algorithm.

Supplementary Table 1. Nonsynonymous somatic mutations in MO\_1005.

| SAMPLE  | GENE            | LOC (hg19)     | REFERENCE | VARIANT | VAR FRAGS TUMOR | TUMOR TOTAL FRAGS | VAR FRAC TUMOR | PROTEIN              | BLOSUM | PolyPhen-2 | SIFT | RPKPM |
|---------|-----------------|----------------|-----------|---------|-----------------|-------------------|----------------|----------------------|--------|------------|------|-------|
| MO_1005 | <i>EPRS</i>     | chr1:220157596 | C         | G       | 12              | 77                | 0.16           | p.L1014F             | 0      | 1.000      | 0    | 45.4  |
| MO_1005 | <i>RBM10</i>    | chrX:47035963  | A         | G       | 30              | 119               | 0.25           | p.N214S              | 1      | 0.997      | 0.80 | 21.9  |
| MO_1005 | <i>FCGR3A</i>   | chr1:161518429 | C         | A       | 63              | 185               | 0.34           | p.W70L,p.W69L,p.W34L | -2     | 1.000      | 0    | 12.6  |
| MO_1005 | <i>STX6</i>     | chr1:180971785 | C         | A       | 61              | 161               | 0.38           | p.S86I               | -2     | 0.908      | 0    | 10.1  |
| MO_1005 | <i>ASCC3</i>    | chr6:101076947 | T         | C       | 7               | 36                | 0.19           | p.N1440S             | 1      | 0          | 0.33 | 7.8   |
| MO_1005 | <i>FRYL</i>     | chr4:48559517  | G         | T       | 6               | 52                | 0.12           | p.Q1360K             | 1      | 0.412      | 0.18 | 7.3   |
| MO_1005 | <i>ZNF711</i>   | chrX:84525090  | A         | T       | 41              | 140               | 0.29           | p.N349I              | -3     | 0.021      | 0.02 | 6.2   |
| MO_1005 | <i>RNF103</i>   | chr2:86847539  | C         | T       | 22              | 62                | 0.35           | p.E94K               | 1      | 0.969      | 0.03 | 6.0   |
| MO_1005 | <i>ARHGEF5</i>  | chr7:144060459 | C         | T       | 23              | 57                | 0.40           | p.Q233*              | -4     | -          | -    | 1.1   |
| MO_1005 | <i>GLIPR1L2</i> | chr12:75816819 | G         | C       | 6               | 60                | 0.10           | p.K240N              | 0      | 0.396      | 0.40 | 0.4   |
| MO_1005 | <i>OR4K5</i>    | chr14:20389481 | C         | T       | 86              | 188               | 0.46           | p.T239M              | -1     | 1.000      | 0    | 0.2   |
| MO_1005 | <i>SLFN14</i>   | chr17:33884483 | T         | C       | 39              | 94                | 0.41           | p.E200G              | -2     | 0.999      | 0    | 0.1   |
| MO_1005 | <i>CLCA1</i>    | chr1:86964441  | G         | A       | 34              | 92                | 0.37           | p.S767N              | 1      | 0          | 0.37 | 0.0   |
| MO_1005 | <i>OR2G2</i>    | chr1:247752034 | C         | T       | 103             | 240               | 0.43           | p.R125C              | -3     | 0.618      | 0.01 | 0.0   |

**Supplementary Table 2. Gene Copy Number Gains in MO\_1005.**

| <b>Segment (hg19)</b>    | <b>Genes in this region</b> | <b>Span</b> | <b>Number of exons</b> | <b>Copy Number Ratio</b> |
|--------------------------|-----------------------------|-------------|------------------------|--------------------------|
| chr3:126260603-126260750 | <i>CHST13</i>               | 148 bp      | 2                      | 1.78                     |
| chr3:62358330-62358478   | <i>FEZF2</i>                | 149 bp      | 2                      | 1.71                     |
| chr16:72821707-72821891  | <i>ZFHX3</i>                | 185 bp      | 2                      | 1.64                     |
| chr7:114562539-114562682 | <i>MDFIC</i>                | 144 bp      | 2                      | 1.63                     |
| chr6:72892428-72892819   | <i>RIMS1</i>                | 392 bp      | 3                      | 1.59                     |
| chr7:149461819-149462177 | <i>ZNF467</i>               | 359 bp      | 3                      | 1.58                     |
| chr6:30888869-30908815   | <i>VAR2, SFTA2, DPCR</i>    | 19,947 bp   | 3                      | 1.45                     |
| chr19:39096074-39096826  | <i>MAP4K1</i>               | 753 bp      | 4                      | 1.41                     |
| chr6:159650958-159653511 | <i>FNDC1</i>                | 2554 bp     | 6                      | 1.33                     |
| chr7:142460789-142494836 | <i>PRSS1, PRSS2</i>         | 34,048 bp   | 7                      | 1.31                     |

**Supplementary Table 3. Gene Copy Number Losses in MO\_1005.**

| <b>Segment (hg19)</b>     | <b>Genes in this region</b> | <b>Span</b> | <b>Number of exons</b> | <b>Copy Number Ratio</b> |
|---------------------------|-----------------------------|-------------|------------------------|--------------------------|
| chr20:43726736-43726889   | <i>KCNS1</i>                | 154 bp      | 2                      | 0.49                     |
| chr20:61511187-61511461   | <i>DIDO1</i>                | 275 bp      | 3                      | 0.58                     |
| chr14:105617103-105617379 | <i>JAG2</i>                 | 277 bp      | 3                      | 0.59                     |
| chr20:825648-825946       | <i>FAM110A</i>              | 299 bp      | 3                      | 0.61                     |
| chr12:22778235-22778399   | <i>ETNK1</i>                | 165 bp      | 2                      | 0.62                     |
| chr12:57493145-57548429   | <i>STAT6, LRP1</i>          | 55,285 bp   | 26                     | 0.66                     |
| chr13:49794585-49795038   | <i>MLNR</i>                 | 454 bp      | 3                      | 0.68                     |
| chr4:53305141-53305907    | <i>none</i>                 | 767 bp      | 7                      | 0.69                     |
| chr19:45656325-45656920   | <i>NKPD1</i>                | 596 bp      | 5                      | 0.70                     |

Supplementary Table 4. Gene fusions identified in 27 SFT tumors. Recurrent *NAB2-STAT6* fusions are in bold.

| SAMPLE    | 5' Gene             | 3' Gene         | # Supporting Reads | Type               | Note       |
|-----------|---------------------|-----------------|--------------------|--------------------|------------|
| MO_1005   | <b>NAB2</b>         | <b>STAT6</b>    | 1104               | Intrachromosomal   |            |
| SFT-3     | <b>NAB2</b>         | <b>STAT6</b>    | 1271               | Intrachromosomal   | Reciprocal |
| SFT-3     | <i>STAT6</i>        | <i>NAB2</i>     | 127                | Intrachromosomal   | Reciprocal |
| SFT-3     | <i>OXTR</i>         | <i>ATXN10</i>   | 4                  | Interchromosomal   |            |
| SFT-18    | <b>NAB2</b>         | <b>STAT6</b>    | 1943               | Intrachromosomal   | Reciprocal |
| SFT-18    | <i>STAT6</i>        | <i>NAB2</i>     | 237                | Intrachromosomal   | Reciprocal |
| SFT-28    | <b>NAB2</b>         | <b>STAT6</b>    | 3131               | Intrachromosomal   |            |
| SFT-28    | <i>ACOX3</i>        | <i>AX746755</i> | 40                 | Read-Through       |            |
| SFT-28    | <i>ZDHHC16</i>      | <i>UBTD1</i>    | 5                  | Read-Through       |            |
| SFT-28    | <i>NCOR2</i>        | <i>OAF</i>      | 4                  | Interchromosomal   |            |
| SFT-31    | <b>NAB2</b>         | <b>STAT6</b>    | 3425               | Intrachromosomal   |            |
| SFT-31    | <i>ZNF337</i>       | <i>C15ORF26</i> | 12                 | Interchromosomal   |            |
| SFT-31    | <i>PEPD</i>         | <i>FXD3</i>     | 14                 | Intrachromosomal   |            |
| SFT-40    | <b>NAB2</b>         | <b>STAT6</b>    | 1415               | Intrachromosomal   |            |
| SFT-44    | <b>NAB2</b>         | <b>STAT6</b>    | 4483               | Intrachromosomal   | Reciprocal |
| SFT-44    | <b>STAT6</b>        | <b>NAB2</b>     | 119                | Intrachromosomal   | Reciprocal |
| SFT-44    | <i>SLICK</i>        | <i>CFH</i>      | 4                  | Intrachromosomal   |            |
| UM-SFT-1  | <b>NAB2</b>         | <b>STAT6</b>    | 885                | Intrachromosomal   | Reciprocal |
| UM-SFT-1  | <i>STAT6</i>        | <i>NAB2</i>     | 5                  | Intrachromosomal   | Reciprocal |
| UM-SFT-2  | <b>NAB2</b>         | <b>STAT6</b>    | 25                 | Intrachromosomal   |            |
| UM-SFT-3  | <b>NAB2</b>         | <b>STAT6</b>    | 1768               | Intrachromosomal   |            |
| UM-SFT-3  | <i>ROC2</i>         | <i>GRK7</i>     | 31                 | Read-Through       |            |
| UM-SFT-4  | <b>NAB2</b>         | <b>STAT6</b>    | 2185               | Intrachromosomal   | Reciprocal |
| UM-SFT-4  | <i>STAT6</i>        | <i>NAB2</i>     | 21                 | Intrachromosomal   | Reciprocal |
| UM-SFT-4  | <i>PSMD5</i>        | <i>TRAF1</i>    | 9                  | Tandem duplication |            |
| UM-SFT-4  | <i>MYL3</i>         | <i>TESSP5</i>   | 7                  | Read-Through       |            |
| UM-SFT-4  | <i>DKFZP761E198</i> | <i>RNASEH2C</i> | 4                  | Read-Through       |            |
| UM-SFT-5  | <b>NAB2</b>         | <b>STAT6</b>    | 717                | Intrachromosomal   |            |
| UM-SFT-5  | <i>BC035722</i>     | <i>RAB28</i>    | 4                  | Read-Through       |            |
| UM-SFT-5  | <i>AF268386</i>     | <i>DDR2</i>     | 3                  | Tandem duplication |            |
| UM-SFT-6  | <b>NAB2</b>         | <b>STAT6</b>    | 657                | Intrachromosomal   | Reciprocal |
| UM-SFT-6  | <i>STAT6</i>        | <i>NAB2</i>     | 44                 | Intrachromosomal   | Reciprocal |
| UM-SFT-7  | <b>NAB2</b>         | <b>STAT6</b>    | 515                | Intrachromosomal   | Reciprocal |
| UM-SFT-7  | <i>STAT6</i>        | <i>NAB2</i>     | 24                 | Intrachromosomal   | Reciprocal |
| UM-SFT-7  | <i>ZMIZ1</i>        | <i>LAYN</i>     | 10                 | Interchromosomal   |            |
| UM-SFT-7  | <i>TGAT</i>         | <i>CDH18</i>    | 10                 | Intrachromosomal   |            |
| UM-SFT-7  | <i>NCOA2</i>        | <i>MAL2</i>     | 6                  | Intrachromosomal   |            |
| UM-SFT-7  | <i>ATXN1</i>        | <i>GMPR</i>     | 6                  | Intrachromosomal   |            |
| UM-SFT-7  | <i>ZFYVE1</i>       | <i>SPRYD7</i>   | 5                  | Interchromosomal   |            |
| UM-SFT-7  | <i>RASAL2</i>       | <i>MAN1A2</i>   | 4                  | Intrachromosomal   |            |
| UM-SFT-8  | <b>NAB2</b>         | <b>STAT6</b>    | 1004               | Intrachromosomal   | Reciprocal |
| UM-SFT-8  | <i>STAT6</i>        | <i>NAB2</i>     | 127                | Intrachromosomal   | Reciprocal |
| UM-SFT-9  | <b>NAB2</b>         | <b>STAT6</b>    | 991                | Intrachromosomal   | Reciprocal |
| UM-SFT-9  | <i>STAT6</i>        | <i>NAB2</i>     | 40                 | Intrachromosomal   | Reciprocal |
| UM-SFT-10 | <b>NAB2</b>         | <b>STAT6</b>    | 924                | Intrachromosomal   |            |
| UM-SFT-11 | <b>NAB2</b>         | <b>STAT6</b>    | 1193               | Intrachromosomal   | Reciprocal |
| UM-SFT-11 | <i>STAT6</i>        | <i>NAB2</i>     | 26                 | Intrachromosomal   | Reciprocal |
| UM-SFT-12 | <b>NAB2</b>         | <b>STAT6</b>    | 401                | Intrachromosomal   |            |
| UM-SFT-13 | <b>NAB2</b>         | <b>STAT6</b>    | 470                | Intrachromosomal   |            |
| UM-SFT-14 | <b>NAB2</b>         | <b>STAT6</b>    | 784                | Intrachromosomal   | Reciprocal |
| UM-SFT-14 | <i>STAT6</i>        | <i>NAB2</i>     | 24                 | Intrachromosomal   | Reciprocal |
| UM-SFT-15 | <b>NAB2</b>         | <b>STAT6</b>    | 1313               | Intrachromosomal   | Reciprocal |
| UM-SFT-15 | <i>STAT6</i>        | <i>NAB2</i>     | 260                | Intrachromosomal   | Reciprocal |
| UM-SFT-16 | <b>NAB2</b>         | <b>STAT6</b>    | 571                | Intrachromosomal   | Reciprocal |
| UM-SFT-16 | <i>STAT6</i>        | <i>NAB2</i>     | 70                 | Intrachromosomal   | Reciprocal |
| UM-SFT-16 | <i>TMEM140</i>      | <i>STRA8</i>    | 13                 | Read-Through       |            |
| UM-SFT-16 | <i>AK097500</i>     | <i>C17ORF78</i> | 5                  | Read-Through       |            |
| UM-SFT-17 | <b>NAB2</b>         | <b>STAT6</b>    | 116                | Intrachromosomal   |            |
| UM-SFT-18 | <b>NAB2</b>         | <b>STAT6</b>    | 472                | Intrachromosomal   |            |
| UM-SFT-19 | <b>NAB2</b>         | <b>STAT6</b>    | 962                | Intrachromosomal   |            |
| UM-SFT-20 | <b>NAB2</b>         | <b>STAT6</b>    | 609                | Intrachromosomal   | Reciprocal |
| UM-SFT-20 | <i>STAT6</i>        | <i>NAB2</i>     | 85                 | Intrachromosomal   | Reciprocal |

Supplementary Table 5. Recurrent Expression Outliers in SFT tumors (Part-1). Outliers are in bold.

| Gene       | Number of Outlier Samples | Gene Expression (RPKM). Bold = Outlier. |              |               |               |               |               |              |
|------------|---------------------------|-----------------------------------------|--------------|---------------|---------------|---------------|---------------|--------------|
|            |                           | MO_1005                                 | SFT3         | SFT18         | SFT28         | SFT31         | SFT40         | SFT44        |
| ABHD14A    | 4                         | <b>64.3</b>                             | <b>43.3</b>  | 20.1          | <b>69.6</b>   | 13.7          | 5.5           | <b>68.0</b>  |
| ABI2       | 4                         | 18.0                                    | <b>26.1</b>  | <b>26.0</b>   | 20.2          | <b>36.5</b>   | <b>36.0</b>   | 14.3         |
| ACCN2      | 4                         | <b>70.4</b>                             | <b>90.9</b>  | 1.3           | <b>36.1</b>   | 0.5           | 19.5          | <b>25.4</b>  |
| ADAMTSL5   | 4                         | 9.9                                     | <b>20.6</b>  | <b>25.7</b>   | <b>23.5</b>   | 12.6          | 8.2           | <b>34.7</b>  |
| AF136186   | 3                         | <b>526.8</b>                            | 14.5         | <b>892.2</b>  | 394.8         | 0.2           | 103.9         | <b>893.2</b> |
| AFAP1L2    | 2                         | 8.9                                     | 2.1          | 17.0          | 14.8          | <b>51.2</b>   | 14.1          | <b>53.6</b>  |
| AHDC1      | 6                         | <b>41.8</b>                             | <b>38.9</b>  | <b>59.9</b>   | <b>38.6</b>   | <b>58.2</b>   | 25.7          | <b>34.1</b>  |
| AK055602   | 3                         | 4.3                                     | 76.0         | <b>120.3</b>  | 30.3          | <b>228.0</b>  | 45.1          | <b>130.8</b> |
| AK074994   | 3                         | 1.5                                     | 5.7          | 10.5          | <b>149.6</b>  | 8.6           | <b>29.3</b>   | <b>25.5</b>  |
| AK092048   | 4                         | <b>50.4</b>                             | <b>52.6</b>  | <b>51.1</b>   | <b>73.5</b>   | 0.1           | 20.2          | 11.3         |
| AK092715   | 3                         | <b>36.2</b>                             | <b>41.3</b>  | 16.7          | <b>61.3</b>   | 2.1           | 15.4          | 5.0          |
| AK095458   | 3                         | <b>967.2</b>                            | <b>466.8</b> | 218.2         | 74.5          | <b>1494.8</b> | 340.6         | 380.6        |
| AK123035   | 2                         | 37.4                                    | 23.2         | <b>60.0</b>   | 12.3          | 10.2          | 20.1          | <b>65.3</b>  |
| AK308561:1 | 4                         | 6.8                                     | <b>34.2</b>  | <b>31.5</b>   | <b>135.7</b>  | 2.0           | 16.8          | <b>57.3</b>  |
| AK308561:2 | 4                         | 5.4                                     | <b>24.4</b>  | <b>20.3</b>   | <b>70.4</b>   | 1.0           | 12.6          | <b>36.5</b>  |
| AL831954   | 3                         | <b>23.4</b>                             | 0.7          | 12.6          | 12.1          | <b>53.2</b>   | 11.5          | <b>41.6</b>  |
| ALKBH5     | 3                         | 79.1                                    | <b>110.8</b> | <b>145.8</b>  | 77.9          | 76.0          | <b>149.0</b>  | 94.5         |
| ALX4       | 7                         | <b>155.6</b>                            | <b>142.8</b> | <b>101.3</b>  | <b>97.7</b>   | <b>98.9</b>   | <b>79.7</b>   | <b>122.8</b> |
| AQP5       | 3                         | <b>85.6</b>                             | <b>182.8</b> | 3.9           | 39.7          | 0.1           | 5.3           | <b>239.7</b> |
| AQP6       | 3                         | <b>34.1</b>                             | <b>46.6</b>  | 0.5           | <b>20.6</b>   | 0.2           | 3.5           | 19.4         |
| argBPIB    | 4                         | 18.5                                    | <b>26.9</b>  | <b>25.1</b>   | 21.7          | <b>32.6</b>   | <b>35.3</b>   | 14.8         |
| ARMCX2     | 2                         | <b>33.9</b>                             | <b>32.3</b>  | 21.3          | 11.6          | 17.8          | 12.0          | 8.1          |
| ATP2B4     | 5                         | 14.2                                    | <b>152.7</b> | <b>162.4</b>  | <b>225.4</b>  | <b>223.5</b>  | <b>115.6</b>  | 74.1         |
| B4GALNT1   | 2                         | 19.0                                    | 11.3         | <b>57.4</b>   | 11.3          | 7.9           | <b>38.2</b>   | 22.6         |
| BAHCC1     | 5                         | <b>80.6</b>                             | <b>60.8</b>  | <b>81.3</b>   | <b>77.6</b>   | 31.2          | 0.7           | <b>74.0</b>  |
| BAI1       | 4                         | 9.7                                     | <b>24.5</b>  | 10.3          | <b>41.3</b>   | <b>27.4</b>   | 3.6           | <b>29.5</b>  |
| BC006113   | 2                         | 1.2                                     | 0.5          | 2.1           | <b>22.1</b>   | 0.6           | 3.8           | <b>70.5</b>  |
| BC010054   | 2                         | 101.9                                   | 1278.0       | <b>1982.5</b> | 157.0         | 621.8         | <b>2056.6</b> | 755.0        |
| BC034684   | 2                         | <b>1940.9</b>                           | 944.6        | 484.0         | 201.8         | <b>3241.9</b> | 686.5         | 785.9        |
| BC080605   | 5                         | 18.2                                    | <b>71.4</b>  | <b>70.2</b>   | <b>354.4</b>  | 3.4           | <b>29.4</b>   | <b>138.4</b> |
| BC110369   | 2                         | 3.9                                     | 19.2         | 17.6          | <b>75.7</b>   | 1.8           | 9.4           | <b>31.9</b>  |
| BCL2       | 3                         | 6.2                                     | <b>20.7</b>  | <b>28.5</b>   | 0.5           | 14.8          | <b>22.1</b>   | 12.5         |
| BCOR       | 4                         | <b>68.6</b>                             | <b>50.2</b>  | 32.8          | <b>119.8</b>  | 22.4          | 11.7          | <b>64.6</b>  |
| BGN        | 2                         | <b>2330.5</b>                           | 155.6        | 110.7         | <b>1581.6</b> | 13.2          | 85.5          | 49.9         |
| BHMT       | 2                         | <b>96.2</b>                             | <b>100.0</b> | 2.3           | 0.2           | 0.3           | 1.3           | 10.4         |
| BMP5       | 3                         | <b>44.2</b>                             | <b>45.5</b>  | 20.1          | 32.1          | 0.2           | 0.7           | <b>44.2</b>  |
| BOC        | 3                         | <b>56.3</b>                             | 19.7         | 37.0          | <b>107.4</b>  | 23.9          | 24.0          | <b>71.7</b>  |
| Borg4      | 3                         | <b>166.3</b>                            | 75.1         | 118.2         | <b>120.9</b>  | <b>287.9</b>  | 42.6          | 107.2        |
| C1orf92    | 3                         | 16.5                                    | <b>48.3</b>  | <b>46.2</b>   | <b>27.1</b>   | 12.4          | 17.7          | 8.8          |
| C1QL1      | 5                         | <b>47.8</b>                             | <b>118.0</b> | <b>34.7</b>   | <b>82.7</b>   | 1.5           | 12.3          | <b>34.6</b>  |
| C1QL4      | 3                         | 0.3                                     | 2.2          | <b>182.7</b>  | 4.2           | 0.6           | <b>133.0</b>  | <b>74.9</b>  |
| C1QTNF4    | 2                         | 0.7                                     | 9.3          | 12.1          | 11.3          | 14.2          | <b>33.5</b>   | <b>104.8</b> |
| C5orf46    | 2                         | <b>65.6</b>                             | 0.7          | 0.1           | <b>39.3</b>   | 0.0           | 0.8           | 0.2          |
| C9orf41    | 3                         | 12.9                                    | <b>22.5</b>  | <b>25.7</b>   | 6.4           | <b>24.2</b>   | 6.5           | 12.6         |
| CA11       | 7                         | <b>176.5</b>                            | <b>127.7</b> | <b>95.6</b>   | <b>138.4</b>  | <b>168.0</b>  | <b>47.9</b>   | <b>80.2</b>  |
| CACNA2D1   | 3                         | <b>21.3</b>                             | <b>28.6</b>  | <b>29.6</b>   | 12.9          | 0.1           | 13.7          | 6.5          |
| CCDS43604  | 6                         | <b>37.0</b>                             | <b>31.9</b>  | <b>40.1</b>   | 19.9          | <b>24.9</b>   | <b>65.6</b>   | <b>24.1</b>  |
| CCR10      | 3                         | <b>30.4</b>                             | 17.6         | <b>46.9</b>   | 9.2           | 7.5           | 15.0          | <b>56.1</b>  |
| CDC42EP4   | 2                         | <b>162.0</b>                            | 72.9         | 115.0         | 113.9         | <b>283.1</b>  | 41.7          | 103.8        |
| CDH24      | 5                         | 62.7                                    | <b>209.7</b> | 91.2          | <b>416.6</b>  | <b>151.3</b>  | <b>137.5</b>  | <b>202.7</b> |
| CDO1       | 2                         | 33.1                                    | <b>75.1</b>  | 15.8          | 12.2          | 33.7          | 16.6          | <b>336.4</b> |
| CELSR2     | 2                         | <b>50.2</b>                             | 0.9          | 0.5           | <b>59.5</b>   | 21.7          | 0.1           | 12.3         |
| CERCAM     | 7                         | <b>112.3</b>                            | <b>88.4</b>  | <b>135.5</b>  | <b>83.5</b>   | <b>134.6</b>  | <b>77.2</b>   | <b>55.7</b>  |
| CFH        | 5                         | <b>678.0</b>                            | <b>547.5</b> | <b>242.2</b>  | <b>166.7</b>  | 87.7          | 2.6           | <b>367.1</b> |
| CHAD       | 4                         | <b>854.5</b>                            | <b>108.5</b> | 9.8           | <b>165.8</b>  | 3.1           | 1.9           | <b>571.9</b> |
| CHI3L1     | 3                         | <b>1660.9</b>                           | <b>849.7</b> | 385.0         | 110.9         | <b>3020.3</b> | 568.5         | 668.9        |
| CLEC4F     | 3                         | 14.8                                    | 1.6          | 3.2           | <b>58.0</b>   | <b>76.1</b>   | 16.3          | <b>48.0</b>  |
| CLSTN3     | 2                         | 21.7                                    | 20.8         | <b>35.0</b>   | 13.7          | <b>41.4</b>   | 24.9          | 12.4         |
| CMKLR1     | 3                         | 4.1                                     | 15.9         | <b>32.9</b>   | 4.1           | <b>36.9</b>   | <b>74.4</b>   | 11.3         |
| COL11A2:1  | 4                         | 8.3                                     | <b>36.6</b>  | <b>29.5</b>   | <b>22.2</b>   | 2.9           | 3.2           | <b>25.1</b>  |
| COL17A1    | 3                         | <b>372.1</b>                            | 10.7         | <b>649.6</b>  | 115.6         | 0.1           | 81.8          | <b>530.3</b> |

Supplementary Table 5. Recurrent Expression Outliers in SFT tumors (Part-2). Outliers are in bold.

| Gene          | Number of<br>Outlier<br>Samples | Gene Expression (RPKM). Bold = Outlier. |               |               |              |               |               |              |
|---------------|---------------------------------|-----------------------------------------|---------------|---------------|--------------|---------------|---------------|--------------|
|               |                                 | MO_1005                                 | SFT3          | SFT18         | SFT28        | SFT31         | SFT40         | SFT44        |
| COL1A1        | 2                               | <b>1544.3</b>                           | 392.2         | 732.4         | 840.2        | 9.6           | <b>3766.5</b> | 120.6        |
| COL8A2        | 2                               | <b>55.1</b>                             | 28.1          | 18.5          | 28.9         | 12.7          | 23.7          | <b>110.5</b> |
| COMP          | 4                               | <b>251.8</b>                            | <b>340.4</b>  | 20.9          | <b>268.3</b> | 1.0           | 18.0          | <b>323.4</b> |
| CPT1C         | 2                               | <b>20.5</b>                             | 7.8           | 13.5          | 14.6         | 15.3          | 13.8          | <b>23.7</b>  |
| CPXM1         | 5                               | <b>79.7</b>                             | <b>617.2</b>  | 16.1          | <b>150.1</b> | 64.9          | <b>119.2</b>  | <b>223.2</b> |
| CPZ           | 5                               | 30.7                                    | <b>260.8</b>  | <b>374.7</b>  | <b>119.5</b> | 1.0           | <b>124.8</b>  | <b>83.0</b>  |
| CR594717      | 2                               | 86.6                                    | 1083.1        | <b>1683.8</b> | 134.0        | 527.7         | <b>1739.7</b> | 635.2        |
| CR596119      | 3                               | 130.0                                   | <b>1568.9</b> | <b>2528.7</b> | 219.8        | 780.1         | <b>2620.9</b> | 949.1        |
| CR597604      | 2                               | 80.1                                    | 1021.8        | <b>1558.4</b> | 120.6        | 491.2         | <b>1624.3</b> | 601.0        |
| CR598488      | 2                               | 5.8                                     | <b>37.6</b>   | 7.1           | <b>33.8</b>  | 0.3           | 2.8           | 5.2          |
| CR607033      | 2                               | 93.7                                    | 1176.4        | <b>1823.5</b> | 144.3        | 571.9         | <b>1892.7</b> | 695.0        |
| CR617227      | 2                               | 30.6                                    | 4.5           | 23.4          | 10.2         | <b>90.0</b>   | <b>94.4</b>   | 5.9          |
| CRTAC1        | 3                               | 1.6                                     | 17.3          | <b>58.2</b>   | 2.9          | 6.9           | <b>143.5</b>  | <b>28.8</b>  |
| CTXN1         | 2                               | 99.6                                    | 53.8          | <b>128.5</b>  | 75.5         | 22.3          | 11.8          | <b>197.2</b> |
| CXXC5         | 3                               | <b>70.1</b>                             | 59.1          | <b>95.9</b>   | <b>87.1</b>  | 12.1          | 5.9           | 16.7         |
| CYP11A1       | 4                               | <b>41.4</b>                             | <b>20.8</b>   | 18.3          | <b>39.1</b>  | 3.0           | 18.9          | <b>78.0</b>  |
| D87946        | 6                               | <b>79.4</b>                             | <b>51.3</b>   | <b>42.5</b>   | <b>52.6</b>  | <b>65.7</b>   | 19.7          | <b>37.1</b>  |
| D87947        | 6                               | <b>46.6</b>                             | <b>30.2</b>   | <b>25.0</b>   | <b>31.4</b>  | <b>38.9</b>   | 11.6          | <b>21.7</b>  |
| DAGLA         | 4                               | 5.3                                     | 9.3           | <b>64.1</b>   | 9.4          | <b>63.8</b>   | <b>47.5</b>   | <b>42.0</b>  |
| DISP1         | 2                               | <b>21.8</b>                             | 11.4          | 4.9           | <b>43.1</b>  | 17.1          | 4.2           | 15.4         |
| DKFZp434D2030 | 2                               | <b>26.8</b>                             | <b>35.6</b>   | 0.4           | 16.1         | 0.2           | 3.0           | 13.8         |
| DKFZp434K2323 | 5                               | 81.3                                    | <b>263.8</b>  | 123.3         | <b>680.6</b> | <b>179.4</b>  | <b>172.0</b>  | <b>274.1</b> |
| DKFZp686A1849 | 2                               | 0.5                                     | 4.7           | <b>21.0</b>   | 0.2          | <b>34.2</b>   | 19.2          | 12.1         |
| DKFZp761D0614 | 5                               | <b>21.0</b>                             | <b>48.6</b>   | <b>23.4</b>   | <b>82.8</b>  | 19.3          | <b>31.7</b>   | 12.5         |
| DKK1          | 2                               | <b>72.7</b>                             | 9.6           | 10.2          | 16.7         | 12.6          | 0.5           | <b>105.7</b> |
| DLX3          | 3                               | <b>89.4</b>                             | <b>69.1</b>   | 22.0          | <b>80.3</b>  | 0.8           | 0.5           | 8.6          |
| DLX4          | 4                               | <b>106.6</b>                            | <b>74.0</b>   | <b>60.7</b>   | <b>193.8</b> | 1.4           | 0.9           | 13.1         |
| DMXL2         | 2                               | 8.5                                     | 15.5          | 6.3           | 19.8         | <b>32.9</b>   | <b>26.0</b>   | 15.3         |
| DNALI1        | 2                               | 32.2                                    | 21.3          | 29.2          | <b>50.0</b>  | 32.6          | 8.7           | <b>42.5</b>  |
| DOK5          | 2                               | 17.9                                    | 7.3           | 13.8          | <b>20.7</b>  | 4.3           | 9.7           | <b>44.5</b>  |
| DPYS          | 2                               | <b>38.9</b>                             | <b>23.3</b>   | 1.9           | 0.1          | 10.7          | 0.4           | 1.8          |
| DQ595431      | 6                               | <b>33.2</b>                             | <b>22.9</b>   | <b>25.8</b>   | 19.4         | <b>27.1</b>   | <b>22.4</b>   | <b>25.1</b>  |
| DSE           | 2                               | 14.5                                    | 21.4          | <b>48.8</b>   | 8.6          | <b>49.4</b>   | 11.7          | 6.3          |
| ECEL1         | 2                               | <b>83.8</b>                             | 41.9          | 10.9          | 24.7         | <b>79.3</b>   | 1.3           | 0.1          |
| EFNA2         | 4                               | <b>48.4</b>                             | <b>106.4</b>  | 1.5           | <b>96.6</b>  | 0.1           | 0.1           | <b>178.6</b> |
| EGFLAM        | 2                               | 7.1                                     | 11.1          | 1.1           | 8.3          | <b>31.9</b>   | <b>31.1</b>   | 14.5         |
| ELFN1         | 2                               | 0.8                                     | <b>20.7</b>   | 10.3          | <b>37.6</b>  | 6.0           | 9.7           | 0.7          |
| EMILIN2       | 2                               | 9.8                                     | 23.4          | <b>80.9</b>   | 17.4         | 40.4          | 36.4          | <b>191.6</b> |
| ENC1          | 2                               | 4.8                                     | 2.5           | 3.0           | 1.6          | <b>239.7</b>  | <b>89.6</b>   | 1.6          |
| EPHB3         | 3                               | 53.9                                    | <b>65.1</b>   | 19.0          | <b>62.9</b>  | 0.8           | 49.1          | <b>82.1</b>  |
| EPYC          | 2                               | 0.1                                     | 0.4           | <b>97.6</b>   | <b>534.0</b> | 6.5           | 3.9           | 7.6          |
| ESM1          | 2                               | 4.7                                     | 6.2           | <b>25.5</b>   | <b>20.2</b>  | 0.2           | 6.0           | 2.8          |
| FAIM2         | 2                               | <b>31.5</b>                             | 10.7          | 14.9          | 8.7          | 3.8           | <b>44.8</b>   | 11.5         |
| FAP           | 2                               | 5.8                                     | 8.8           | 13.6          | 0.4          | 13.3          | <b>40.4</b>   | <b>25.8</b>  |
| FBLN1         | 2                               | 65.7                                    | 65.1          | <b>1029.7</b> | 52.0         | <b>1055.5</b> | 283.3         | 553.2        |
| FEZF2         | 4                               | 0.1                                     | <b>98.9</b>   | <b>25.4</b>   | 0.1          | 0.0           | <b>37.8</b>   | <b>34.3</b>  |
| FGF2          | 2                               | 13.9                                    | <b>30.3</b>   | <b>22.1</b>   | 7.9          | 8.1           | 9.3           | 11.3         |
| FGFR1         | 6                               | 47.1                                    | <b>178.9</b>  | <b>219.9</b>  | <b>114.7</b> | <b>224.1</b>  | <b>234.1</b>  | <b>238.2</b> |
| FKSG40        | 6                               | <b>51.0</b>                             | <b>335.5</b>  | <b>111.3</b>  | <b>113.1</b> | <b>55.6</b>   | 18.3          | <b>294.3</b> |
| FLJ00193      | 6                               | <b>83.0</b>                             | <b>149.7</b>  | <b>151.6</b>  | <b>143.6</b> | <b>66.9</b>   | 32.4          | <b>68.2</b>  |
| FLJ37078      | 2                               | 17.5                                    | 16.1          | <b>20.2</b>   | 8.2          | 11.6          | <b>31.2</b>   | 13.7         |
| FLJ37464      | 3                               | <b>28.6</b>                             | 11.8          | 16.2          | <b>27.4</b>  | <b>26.5</b>   | 17.1          | 8.2          |
| FOXP4         | 6                               | <b>169.0</b>                            | <b>190.3</b>  | <b>144.9</b>  | <b>158.0</b> | 50.5          | <b>127.8</b>  | <b>182.3</b> |
| FRS2          | 2                               | 8.4                                     | 8.5           | <b>28.6</b>   | 18.5         | 14.5          | <b>21.5</b>   | 13.8         |
| FZD7          | 4                               | 6.7                                     | <b>181.7</b>  | <b>76.9</b>   | 21.5         | 26.0          | <b>85.4</b>   | <b>104.6</b> |
| GFRAL         | 2                               | <b>23.3</b>                             | 0.0           | 0.3           | 2.4          | 0.0           | 0.0           | <b>33.1</b>  |
| Gli2          | 4                               | 13.4                                    | 16.4          | <b>42.9</b>   | 15.5         | <b>37.3</b>   | <b>36.3</b>   | <b>20.3</b>  |
| GLI2          | 6                               | 17.5                                    | <b>24.3</b>   | <b>52.4</b>   | <b>25.1</b>  | <b>36.8</b>   | <b>42.8</b>   | <b>30.9</b>  |
| GLS           | 2                               | <b>39.5</b>                             | 20.2          | 15.4          | <b>43.4</b>  | 6.4           | 10.1          | 9.9          |
| GP1BB         | 3                               | 28.9                                    | 35.7          | <b>52.8</b>   | <b>60.3</b>  | 13.0          | 29.0          | <b>122.0</b> |
| GPC4          | 3                               | <b>103.4</b>                            | <b>57.6</b>   | 5.8           | 0.2          | 14.7          | 9.0           | <b>203.0</b> |



Supplementary Table 5. Recurrent Expression Outliers in SFT tumors (Part-3). Outliers are in bold.

| Gene       | Number of Outlier Samples | Gene Expression (RPKM). Bold = Outlier. |               |               |                |                |               |                |
|------------|---------------------------|-----------------------------------------|---------------|---------------|----------------|----------------|---------------|----------------|
|            |                           | MO_1005                                 | SFT3          | SFT18         | SFT28          | SFT31          | SFT40         | SFT44          |
| GPM6B      | 3                         | 28.7                                    | 2.6           | <b>212.1</b>  | <b>168.9</b>   | 57.7           | 32.2          | <b>170.3</b>   |
| GPR162     | 2                         | 10.5                                    | 6.3           | 9.6           | <b>28.2</b>    | 14.8           | 7.5           | <b>25.5</b>    |
| GPR78      | 5                         | 18.0                                    | <b>150.3</b>  | <b>217.7</b>  | <b>70.6</b>    | 0.6            | <b>71.7</b>   | <b>48.0</b>    |
| GPR88      | 7                         | <b>52.9</b>                             | <b>57.2</b>   | <b>205.1</b>  | <b>24.2</b>    | <b>198.5</b>   | <b>99.7</b>   | <b>151.1</b>   |
| GRIA2      | 4                         | 10.7                                    | <b>108.8</b>  | <b>62.5</b>   | 0.1            | <b>25.5</b>    | <b>166.1</b>  | 0.1            |
| GSN        | 3                         | 712.6                                   | <b>2319.7</b> | <b>2208.5</b> | 200.3          | 722.5          | 1070.6        | <b>1826.9</b>  |
| HDAC9      | 2                         | <b>22.1</b>                             | 11.6          | 17.4          | <b>20.3</b>    | 7.2            | 0.4           | 16.1           |
| HECTD2     | 3                         | 15.1                                    | <b>35.8</b>   | 17.2          | <b>60.5</b>    | 14.7           | <b>24.0</b>   | 9.2            |
| hGli2      | 6                         | 18.0                                    | <b>25.0</b>   | <b>53.0</b>   | <b>26.3</b>    | <b>36.4</b>    | <b>43.4</b>   | <b>32.0</b>    |
| HOXB3      | 5                         | 1.2                                     | <b>98.7</b>   | <b>54.0</b>   | 1.8            | <b>54.9</b>    | <b>34.3</b>   | <b>31.0</b>    |
| HOXB6      | 2                         | 0.4                                     | 22.2          | 12.7          | 0.5            | <b>45.7</b>    | 2.8           | <b>31.2</b>    |
| HOXB8      | 3                         | 0.1                                     | <b>41.7</b>   | 16.5          | 0.4            | <b>26.2</b>    | 1.2           | <b>43.0</b>    |
| HOXC10     | 7                         | <b>99.1</b>                             | <b>155.5</b>  | <b>98.7</b>   | <b>417.7</b>   | <b>137.4</b>   | <b>72.4</b>   | <b>228.0</b>   |
| HOXC11     | 7                         | <b>63.8</b>                             | <b>96.8</b>   | <b>77.0</b>   | <b>70.3</b>    | <b>63.7</b>    | <b>44.7</b>   | <b>117.8</b>   |
| HOXC12     | 6                         | <b>30.7</b>                             | <b>40.9</b>   | <b>41.7</b>   | <b>27.3</b>    | <b>26.2</b>    | 0.4           | <b>94.5</b>    |
| HOXC13     | 6                         | <b>40.2</b>                             | <b>24.6</b>   | <b>42.7</b>   | <b>33.5</b>    | <b>22.7</b>    | 0.3           | <b>70.1</b>    |
| HOXC4      | 7                         | <b>90.3</b>                             | <b>52.0</b>   | <b>46.5</b>   | <b>109.5</b>   | <b>46.8</b>    | <b>55.3</b>   | <b>63.8</b>    |
| HOXC5      | 7                         | <b>32.1</b>                             | <b>26.9</b>   | <b>20.9</b>   | <b>48.9</b>    | <b>23.3</b>    | <b>23.0</b>   | <b>22.6</b>    |
| HOXC6      | 7                         | <b>128.1</b>                            | <b>90.2</b>   | <b>57.4</b>   | <b>165.0</b>   | <b>57.7</b>    | <b>60.7</b>   | <b>86.4</b>    |
| HOXC8      | 7                         | <b>44.9</b>                             | <b>43.2</b>   | <b>33.5</b>   | <b>157.8</b>   | <b>22.2</b>    | <b>28.6</b>   | <b>32.8</b>    |
| HOXC9      | 2                         | <b>95.8</b>                             | 57.5          | 45.3          | <b>98.0</b>    | 23.8           | 31.2          | 62.0           |
| HSD11B1    | 5                         | <b>126.7</b>                            | <b>57.5</b>   | <b>82.1</b>   | 11.3           | 4.7            | <b>81.4</b>   | <b>139.6</b>   |
| IGF1       | 2                         | <b>43.0</b>                             | 2.6           | 11.3          | 1.4            | 9.5            | <b>160.8</b>  | 14.2           |
| IGF2       | 7                         | <b>3169.1</b>                           | <b>4851.2</b> | <b>3275.5</b> | <b>11939.1</b> | <b>12992.3</b> | <b>4698.0</b> | <b>9851.7</b>  |
| IGF2AS     | 7                         | <b>33.7</b>                             | <b>51.1</b>   | <b>21.4</b>   | <b>46.7</b>    | <b>47.0</b>    | <b>24.2</b>   | <b>106.7</b>   |
| IL11RA     | 6                         | <b>46.8</b>                             | <b>140.0</b>  | <b>58.0</b>   | <b>52.2</b>    | <b>36.8</b>    | 28.0          | <b>52.0</b>    |
| INS-IGF2   | 7                         | <b>3687.9</b>                           | <b>5616.8</b> | <b>3804.4</b> | <b>14003.5</b> | <b>14716.8</b> | <b>5393.3</b> | <b>11495.2</b> |
| IQSEC3     | 4                         | 12.2                                    | <b>28.2</b>   | <b>31.9</b>   | 8.5            | <b>28.7</b>    | <b>36.3</b>   | 14.0           |
| ISLR       | 6                         | <b>980.0</b>                            | <b>1004.1</b> | <b>371.3</b>  | <b>1250.7</b>  | 232.6          | <b>277.6</b>  | <b>1225.4</b>  |
| ISYNA1     | 2                         | 82.6                                    | 63.0          | 42.9          | 57.9           | <b>134.1</b>   | 11.5          | <b>108.9</b>   |
| KAZALD1    | 6                         | <b>64.6</b>                             | <b>415.4</b>  | <b>140.6</b>  | <b>126.8</b>   | <b>79.9</b>    | 27.2          | <b>303.2</b>   |
| KCNAB3     | 2                         | <b>20.9</b>                             | 19.5          | 7.1           | <b>37.6</b>    | 4.7            | 7.7           | 13.6           |
| KCNC1      | 3                         | <b>20.2</b>                             | 14.1          | 0.1           | <b>80.6</b>    | 0.0            | 0.4           | <b>31.8</b>    |
| KCTD1      | 6                         | <b>116.0</b>                            | 2.9           | <b>62.3</b>   | <b>52.7</b>    | <b>248.2</b>   | <b>49.0</b>   | <b>187.2</b>   |
| KERA       | 2                         | 0.0                                     | 0.0           | <b>151.9</b>  | <b>267.8</b>   | 6.1            | 10.6          | 3.0            |
| KHDRBS3    | 2                         | 3.3                                     | 2.2           | 5.4           | 2.6            | <b>62.3</b>    | <b>52.9</b>   | 10.1           |
| KIAA0182   | 7                         | <b>54.0</b>                             | <b>63.4</b>   | <b>107.2</b>  | <b>83.9</b>    | <b>156.5</b>   | <b>99.3</b>   | <b>59.2</b>    |
| KIAA0638   | 2                         | 36.7                                    | 143.1         | 123.3         | 63.5           | 84.2           | <b>211.0</b>  | <b>149.1</b>   |
| KIAA0709:1 | 5                         | <b>308.1</b>                            | <b>253.4</b>  | <b>253.0</b>  | 161.9          | 187.9          | <b>319.4</b>  | <b>399.2</b>   |
| KIAA0709:2 | 6                         | <b>270.8</b>                            | <b>232.4</b>  | <b>235.0</b>  | 54.4           | <b>207.0</b>   | <b>324.7</b>  | <b>274.4</b>   |
| KIAA0827:2 | 2                         | 13.1                                    | <b>24.6</b>   | 20.5          | <b>49.5</b>    | 11.2           | 11.8          | 11.9           |
| KIAA0856   | 4                         | 33.5                                    | <b>44.1</b>   | 16.3          | <b>64.2</b>    | <b>53.4</b>    | <b>62.4</b>   | 40.5           |
| KIAA0897   | 2                         | <b>31.9</b>                             | 8.8           | <b>36.8</b>   | 17.6           | 11.6           | 16.1          | 4.3            |
| KIAA0950   | 2                         | <b>37.4</b>                             | 12.6          | 17.7          | 10.2           | 4.5            | <b>53.4</b>   | 13.7           |
| KIAA0957   | 2                         | <b>24.3</b>                             | <b>22.6</b>   | 5.6           | 12.1           | 3.4            | 6.6           | 11.2           |
| KIAA1171   | 2                         | 2.9                                     | 4.2           | <b>27.1</b>   | 2.4            | <b>28.2</b>    | 11.7          | 2.9            |
| KIAA1308   | 2                         | <b>71.4</b>                             | 63.5          | 49.5          | <b>81.6</b>    | 17.6           | 8.8           | 67.7           |
| KIAA1350   | 2                         | 4.6                                     | 2.3           | <b>80.6</b>   | <b>87.3</b>    | 40.6           | 6.2           | 12.8           |
| KIAA1444   | 2                         | <b>34.1</b>                             | 1.1           | 6.0           | <b>46.8</b>    | 0.4            | 11.1          | 10.7           |
| KIAA1462   | 2                         | 2.3                                     | 48.9          | <b>99.6</b>   | 9.3            | <b>266.2</b>   | 37.1          | 37.8           |
| KIAA1482   | 4                         | <b>61.6</b>                             | 24.9          | <b>48.4</b>   | <b>78.8</b>    | 6.2            | 36.7          | <b>52.1</b>    |
| KIAA1520   | 2                         | <b>25.1</b>                             | 11.2          | 10.1          | 13.4           | 4.6            | 2.4           | <b>24.3</b>    |
| KIAA1547   | 5                         | <b>65.5</b>                             | <b>79.5</b>   | <b>84.8</b>   | <b>72.6</b>    | 24.9           | 24.2          | <b>82.7</b>    |
| LAG3       | 5                         | 17.1                                    | <b>81.8</b>   | <b>135.9</b>  | 13.6           | <b>34.7</b>    | <b>44.9</b>   | <b>283.9</b>   |
| LHX2       | 2                         | 5.0                                     | <b>70.7</b>   | 0.7           | 0.2            | 0.0            | 11.1          | <b>20.7</b>    |
| LMO4       | 2                         | <b>364.5</b>                            | 104.7         | 28.1          | <b>300.8</b>   | 33.5           | 57.6          | 201.4          |
| LOC126520  | 3                         | 3.9                                     | <b>52.0</b>   | <b>31.4</b>   | 10.8           | 5.5            | 0.2           | <b>49.2</b>    |
| LOC284297  | 2                         | <b>180.3</b>                            | 58.9          | 26.6          | <b>292.7</b>   | 25.9           | 5.9           | 40.7           |
| LOC404266  | 3                         | 0.1                                     | <b>57.9</b>   | <b>32.3</b>   | <b>32.3</b>    | 0.0            | <b>20.5</b>   | 13.4           |
| LOC91461   | 7                         | <b>316.5</b>                            | <b>303.0</b>  | <b>147.9</b>  | <b>505.4</b>   | <b>280.7</b>   | <b>258.6</b>  | <b>322.2</b>   |
| LPHN1      | 5                         | 15.6                                    | <b>33.5</b>   | <b>27.1</b>   | <b>35.5</b>    | <b>32.7</b>    | 18.9          | <b>42.0</b>    |

Supplementary Table 5. Recurrent Expression Outliers in SFT tumors (Part-4). Outliers are in bold.

| Gene                 | Number of Outlier Samples | Gene Expression (RPKM). Bold = Outlier. |               |               |                |                |               |                |
|----------------------|---------------------------|-----------------------------------------|---------------|---------------|----------------|----------------|---------------|----------------|
|                      |                           | MO_1005                                 | SFT3          | SFT18         | SFT28          | SFT31          | SFT40         | SFT44          |
| LRCH2                | 2                         | <b>20.3</b>                             | 6.1           | 0.4           | <b>49.0</b>    | 6.8            | 3.8           | 7.1            |
| LRP3                 | 4                         | 61.9                                    | <b>112.2</b>  | <b>94.3</b>   | 50.0           | <b>78.5</b>    | 55.0          | <b>199.3</b>   |
| LSP1                 | 4                         | <b>250.9</b>                            | <b>255.6</b>  | 230.2         | <b>369.4</b>   | 208.5          | 98.4          | <b>517.5</b>   |
| MAP3K12              | 2                         | 37.1                                    | 30.6          | 25.3          | <b>42.6</b>    | <b>50.7</b>    | 27.4          | 16.4           |
| MCOLN3               | 3                         | <b>62.9</b>                             | 0.3           | 5.7           | 0.7            | <b>197.5</b>   | <b>49.9</b>   | 0.1            |
| MPDZ                 | 2                         | 25.3                                    | <b>32.4</b>   | <b>63.9</b>   | 22.2           | 22.1           | 23.3          | 18.3           |
| MPDZ_variant_protein | 4                         | <b>31.7</b>                             | <b>37.3</b>   | <b>71.7</b>   | <b>31.4</b>    | 22.3           | 25.1          | 21.6           |
| MRC2                 | 6                         | <b>286.4</b>                            | <b>244.3</b>  | <b>250.1</b>  | 114.7          | <b>215.0</b>   | <b>329.4</b>  | <b>341.3</b>   |
| MST123               | 6                         | 67.7                                    | <b>243.2</b>  | <b>304.4</b>  | <b>196.1</b>   | <b>285.9</b>   | <b>308.3</b>  | <b>356.8</b>   |
| MUM1                 | 2                         | <b>34.5</b>                             | 22.9          | 24.6          | <b>32.0</b>    | 7.9            | 12.5          | 28.2           |
| MXRA5                | 4                         | 28.3                                    | <b>405.9</b>  | <b>276.5</b>  | <b>83.0</b>    | 41.7           | 41.5          | <b>88.7</b>    |
| NAB1                 | 7                         | <b>75.5</b>                             | <b>113.4</b>  | <b>100.9</b>  | <b>130.4</b>   | <b>64.5</b>    | <b>86.0</b>   | <b>76.6</b>    |
| NAB2                 | 5                         | <b>92.2</b>                             | 81.5          | <b>89.1</b>   | 67.7           | <b>136.7</b>   | <b>91.4</b>   | <b>117.8</b>   |
| NCAM2                | 2                         | 0.7                                     | <b>28.2</b>   | <b>32.9</b>   | 1.7            | 4.5            | 14.6          | 9.7            |
| NEFL                 | 2                         | 0.2                                     | 0.0           | 14.9          | 0.0            | <b>104.4</b>   | <b>72.6</b>   | 0.0            |
| NFIX                 | 6                         | <b>408.1</b>                            | <b>436.6</b>  | <b>437.1</b>  | <b>451.6</b>   | <b>387.4</b>   | 222.1         | <b>617.4</b>   |
| NPB:1                | 3                         | <b>25.7</b>                             | 7.2           | 5.7           | <b>157.6</b>   | 0.4            | 6.2           | <b>122.8</b>   |
| NPH4                 | 2                         | <b>40.6</b>                             | 0.6           | 1.8           | 9.8            | <b>58.6</b>    | 4.6           | 0.8            |
| NPW                  | 7                         | <b>594.9</b>                            | <b>2341.1</b> | <b>588.3</b>  | <b>1751.5</b>  | <b>382.1</b>   | <b>21.5</b>   | <b>1178.0</b>  |
| NR_002775            | 3                         | 7.6                                     | 9.6           | <b>41.6</b>   | 14.7           | 2.9            | <b>23.1</b>   | <b>21.6</b>    |
| NR_002797            | 5                         | <b>198.7</b>                            | <b>271.2</b>  | <b>215.7</b>  | <b>362.0</b>   | 150.3          | 146.9         | <b>538.5</b>   |
| NR_003716            | 7                         | <b>124.5</b>                            | <b>116.8</b>  | <b>119.2</b>  | <b>194.9</b>   | <b>140.0</b>   | <b>42.0</b>   | <b>174.1</b>   |
| NR3C1                | 2                         | 7.5                                     | 25.6          | <b>68.7</b>   | 26.0           | <b>43.0</b>    | 39.6          | 16.4           |
| NRG2:3               | 2                         | 5.9                                     | 9.3           | 5.2           | <b>28.0</b>    | 19.6           | 1.8           | <b>47.4</b>    |
| NRGN                 | 5                         | 191.0                                   | <b>480.4</b>  | <b>279.3</b>  | <b>579.4</b>   | <b>699.3</b>   | 104.2         | <b>2015.6</b>  |
| NTRK1                | 4                         | <b>35.2</b>                             | <b>28.2</b>   | <b>58.3</b>   | <b>30.5</b>    | 0.0            | 14.0          | 0.8            |
| NUMBL                | 4                         | 37.3                                    | <b>56.0</b>   | <b>53.0</b>   | 34.5           | 43.6           | <b>62.2</b>   | <b>58.6</b>    |
| NXPH4                | 2                         | <b>45.0</b>                             | 0.7           | 2.0           | 10.8           | <b>65.0</b>    | 5.0           | 0.9            |
| OAF                  | 2                         | 164.2                                   | 192.9         | 25.0          | <b>284.7</b>   | 97.7           | 7.3           | <b>447.7</b>   |
| OLFM2                | 5                         | 6.1                                     | <b>385.4</b>  | <b>347.1</b>  | <b>127.6</b>   | 9.1            | <b>97.2</b>   | <b>94.9</b>    |
| PALM                 | 3                         | <b>111.9</b>                            | 98.5          | <b>117.7</b>  | 89.8           | 59.8           | 72.7          | <b>152.4</b>   |
| PAM                  | 2                         | <b>301.7</b>                            | <b>269.4</b>  | 29.8          | 166.6          | 100.8          | 29.3          | 33.8           |
| PCDH10               | 2                         | 1.3                                     | <b>69.7</b>   | <b>51.1</b>   | 9.3            | 0.2            | 0.2           | 23.6           |
| PCOLCE               | 4                         | 112.6                                   | <b>1179.3</b> | <b>1089.3</b> | 462.5          | 429.2          | <b>710.2</b>  | <b>1392.6</b>  |
| PCSK1                | 3                         | <b>42.5</b>                             | 6.8           | 3.7           | 3.3            | <b>41.1</b>    | <b>182.1</b>  | 9.4            |
| PDGFD                | 3                         | <b>66.6</b>                             | 38.3          | <b>67.4</b>   | 5.6            | 12.5           | <b>184.0</b>  | 19.9           |
| PDZD4                | 2                         | <b>48.6</b>                             | 1.6           | 9.9           | <b>61.3</b>    | 0.5            | 15.2          | 20.2           |
| PEAR1                | 6                         | <b>82.3</b>                             | <b>149.3</b>  | <b>151.6</b>  | <b>142.2</b>   | <b>67.5</b>    | 32.1          | <b>66.9</b>    |
| PEG8/IGF2AS          | 7                         | <b>34.4</b>                             | <b>52.6</b>   | <b>22.0</b>   | <b>48.0</b>    | <b>48.0</b>    | <b>24.1</b>   | <b>109.6</b>   |
| PEPP1                | 3                         | <b>144.2</b>                            | 54.5          | <b>102.8</b>  | 62.7           | 50.6           | 77.3          | <b>134.8</b>   |
| PAM                  | 2                         | <b>299.0</b>                            | <b>239.5</b>  | 23.8          | 107.1          | 93.8           | 23.0          | 23.3           |
| PHYHIP               | 3                         | 4.8                                     | 16.5          | <b>154.8</b>  | 5.3            | <b>68.0</b>    | <b>49.2</b>   | 2.5            |
| PLEKHA4              | 3                         | <b>134.3</b>                            | 56.3          | <b>109.3</b>  | 62.9           | 62.8           | 84.3          | <b>118.0</b>   |
| PLEKHG2              | 3                         | 9.9                                     | <b>29.2</b>   | 14.4          | <b>31.4</b>    | <b>32.8</b>    | 11.2          | 18.2           |
| PLK5                 | 3                         | 2.7                                     | <b>40.8</b>   | <b>25.1</b>   | 8.0            | 4.6            | 0.1           | <b>37.7</b>    |
| PLSCR4               | 2                         | 19.1                                    | 20.5          | <b>68.9</b>   | 26.9           | 12.8           | 6.5           | <b>65.0</b>    |
| PNMAL1               | 2                         | <b>22.6</b>                             | 13.9          | 13.9          | 6.3            | <b>22.2</b>    | 17.2          | 15.5           |
| PP14296              | 5                         | 4.1                                     | <b>81.2</b>   | <b>111.1</b>  | <b>54.9</b>    | 26.3           | <b>150.7</b>  | <b>261.8</b>   |
| pp9974               | 7                         | <b>4580.0</b>                           | <b>6957.1</b> | <b>4723.8</b> | <b>17468.1</b> | <b>18147.8</b> | <b>6668.1</b> | <b>14211.7</b> |
| PPFIA4               | 2                         | <b>27.6</b>                             | 7.5           | <b>31.5</b>   | 14.5           | 11.4           | 13.6          | 3.7            |
| PRCD                 | 2                         | 1.9                                     | <b>43.2</b>   | 19.7          | 13.4           | 21.2           | 3.9           | <b>31.7</b>    |
| PRKACB               | 3                         | <b>131.1</b>                            | 15.3          | <b>113.3</b>  | 32.1           | <b>173.6</b>   | 38.5          | 2.3            |
| PROS1                | 2                         | <b>71.0</b>                             | 15.2          | 7.2           | <b>63.0</b>    | 8.2            | 7.1           | 12.9           |
| PRRX2                | 5                         | 57.9                                    | <b>94.6</b>   | <b>211.9</b>  | <b>301.9</b>   | <b>115.2</b>   | 52.2          | <b>148.1</b>   |
| PRTN3                | 2                         | 1.1                                     | <b>21.2</b>   | 1.9           | 2.9            | 11.9           | 0.9           | <b>24.2</b>    |
| PSD                  | 2                         | 16.7                                    | 18.9          | <b>24.4</b>   | 8.1            | 9.2            | 16.3          | <b>23.2</b>    |
| PTCH2                | 4                         | 10.6                                    | <b>90.9</b>   | <b>41.2</b>   | <b>37.9</b>    | 2.4            | 5.9           | <b>31.0</b>    |
| PTGDS                | 2                         | 526.8                                   | 616.5         | 4.1           | <b>5060.5</b>  | 263.2          | 33.0          | <b>6228.9</b>  |
| PTPN13               | 2                         | 4.7                                     | 17.8          | <b>20.4</b>   | 1.4            | <b>29.7</b>    | 18.2          | 10.9           |
| PTPRV                | 2                         | <b>39.1</b>                             | 0.9           | 7.9           | 0.3            | 4.8            | <b>31.0</b>   | 0.1            |
| RALGDS               | 2                         | <b>72.5</b>                             | 66.2          | 51.4          | <b>83.5</b>    | 18.3           | 9.1           | 70.9           |

Supplementary Table 5. Recurrent Expression Outliers in SFT tumors (Part-5). Outliers are in bold.

| Gene          | Number of Outlier Samples | Gene Expression (RPKM). Bold = Outlier. |              |              |              |              |              |              |
|---------------|---------------------------|-----------------------------------------|--------------|--------------|--------------|--------------|--------------|--------------|
|               |                           | MO_1005                                 | SFT3         | SFT18        | SFT28        | SFT31        | SFT40        | SFT44        |
| RARA          | 5                         | <b>161.6</b>                            | <b>123.9</b> | <b>146.4</b> | <b>119.3</b> | 79.0         | 74.6         | <b>126.6</b> |
| RBM9          | 3                         | <b>48.0</b>                             | <b>80.9</b>  | 40.2         | <b>47.0</b>  | 24.0         | 22.3         | 40.2         |
| RCN3          | 6                         | <b>162.3</b>                            | <b>102.5</b> | <b>83.8</b>  | <b>190.5</b> | 79.1         | <b>92.3</b>  | <b>114.4</b> |
| ROM1          | 2                         | 7.1                                     | 8.4          | <b>26.2</b>  | 13.3         | 11.1         | 13.1         | <b>30.2</b>  |
| SALP          | 2                         | 3.9                                     | 2.1          | 5.9          | 3.1          | <b>61.7</b>  | <b>53.6</b>  | 10.4         |
| SCLIP         | 3                         | <b>113.2</b>                            | 29.8         | 16.4         | <b>89.3</b>  | 58.1         | 20.6         | <b>146.7</b> |
| SCN4B         | 4                         | <b>51.0</b>                             | <b>559.4</b> | 29.0         | <b>41.8</b>  | 1.5          | 3.1          | <b>837.6</b> |
| SEMA6C        | 5                         | <b>24.2</b>                             | <b>62.3</b>  | <b>25.5</b>  | <b>41.2</b>  | 9.1          | 15.4         | <b>33.7</b>  |
| SEMA7A        | 5                         | <b>222.4</b>                            | <b>204.7</b> | <b>141.9</b> | <b>69.3</b>  | 7.3          | 15.2         | <b>181.2</b> |
| semaY         | 3                         | 18.4                                    | <b>49.5</b>  | 20.2         | <b>30.0</b>  | 8.5          | 12.9         | <b>21.9</b>  |
| SEPT5         | 3                         | 23.0                                    | 28.0         | <b>38.0</b>  | <b>44.5</b>  | 9.6          | 22.0         | <b>85.4</b>  |
| SERTAD2       | 3                         | <b>27.3</b>                             | <b>32.4</b>  | <b>30.7</b>  | 16.0         | 22.6         | 20.7         | 22.0         |
| SESN3         | 2                         | 2.3                                     | 4.0          | 6.9          | 1.0          | <b>24.7</b>  | <b>26.9</b>  | 1.5          |
| SEZ6L2        | 2                         | 42.8                                    | 22.2         | <b>83.4</b>  | 52.1         | 7.6          | 62.4         | <b>86.3</b>  |
| SH3PXD2A      | 4                         | 29.5                                    | <b>63.7</b>  | <b>98.8</b>  | 36.9         | 23.6         | <b>183.3</b> | <b>57.9</b>  |
| SIPA1L1       | 2                         | 15.6                                    | 5.7          | 6.4          | 13.2         | <b>31.6</b>  | 6.8          | <b>27.9</b>  |
| SIX1          | 6                         | <b>61.0</b>                             | <b>43.6</b>  | <b>21.0</b>  | <b>68.7</b>  | 0.5          | <b>38.4</b>  | <b>75.2</b>  |
| SLC38A10      | 3                         | <b>136.0</b>                            | <b>106.2</b> | 79.8         | 72.0         | 39.6         | 28.0         | <b>124.8</b> |
| SLIT2         | 2                         | <b>42.0</b>                             | 0.3          | 1.9          | 3.3          | 7.1          | <b>57.0</b>  | 14.2         |
| SLITRK3       | 2                         | 0.0                                     | <b>33.5</b>  | <b>26.8</b>  | 0.0          | 0.8          | 0.8          | 0.8          |
| SMG6          | 2                         | 26.3                                    | 39.0         | <b>47.0</b>  | 29.9         | 31.1         | 24.3         | <b>51.1</b>  |
| SORCS2        | 4                         | <b>42.7</b>                             | 5.3          | <b>85.4</b>  | 0.5          | <b>51.7</b>  | <b>83.0</b>  | 1.1          |
| SPHK1         | 2                         | 27.0                                    | <b>49.9</b>  | 22.4         | 38.2         | 1.6          | 4.8          | <b>73.8</b>  |
| STAT6         | 2                         | 126.4                                   | 124.6        | 157.8        | 167.6        | <b>301.6</b> | <b>203.4</b> | 148.0        |
| STIM2         | 4                         | <b>48.7</b>                             | 21.1         | <b>40.8</b>  | <b>58.8</b>  | 5.4          | 31.4         | <b>42.6</b>  |
| STMN3         | 3                         | <b>117.8</b>                            | 31.0         | 17.1         | <b>93.0</b>  | 60.6         | 21.4         | <b>152.9</b> |
| STRA6         | 5                         | 3.7                                     | <b>70.7</b>  | <b>96.9</b>  | <b>48.5</b>  | 23.5         | <b>131.5</b> | <b>232.6</b> |
| SYNGAP1       | 5                         | <b>43.5</b>                             | 26.4         | <b>28.8</b>  | <b>56.0</b>  | <b>47.6</b>  | <b>36.6</b>  | 8.1          |
| SYT1          | 3                         | 0.6                                     | 10.7         | <b>23.4</b>  | 4.3          | <b>24.4</b>  | <b>30.0</b>  | 1.1          |
| SYT7          | 6                         | <b>222.4</b>                            | <b>329.1</b> | <b>458.9</b> | <b>235.8</b> | 123.3        | <b>448.8</b> | <b>176.6</b> |
| TAL1          | 4                         | <b>40.7</b>                             | 1.6          | 16.0         | <b>44.8</b>  | <b>58.3</b>  | 4.8          | <b>46.7</b>  |
| TBX15         | 3                         | 0.3                                     | 9.6          | 1.9          | <b>59.8</b>  | <b>42.8</b>  | 25.3         | <b>39.8</b>  |
| TBX5          | 2                         | 0.0                                     | 1.1          | <b>56.3</b>  | 0.1          | 0.6          | <b>50.6</b>  | 0.1          |
| TCF-4B        | 4                         | 14.9                                    | <b>59.1</b>  | <b>84.1</b>  | <b>121.5</b> | 33.7         | 42.1         | <b>67.0</b>  |
| TCF7L2        | 3                         | 13.8                                    | 46.2         | <b>71.7</b>  | <b>71.4</b>  | 30.3         | 37.4         | <b>56.6</b>  |
| TCTN1         | 2                         | <b>26.9</b>                             | <b>32.5</b>  | 21.5         | 17.5         | 14.6         | 16.3         | 21.2         |
| THBS4         | 2                         | 61.9                                    | <b>171.6</b> | 4.9          | 2.6          | 1.0          | <b>133.5</b> | 14.2         |
| TLE2          | 5                         | <b>231.2</b>                            | <b>218.3</b> | <b>225.0</b> | <b>316.5</b> | 80.5         | 20.6         | <b>342.8</b> |
| TLE3          | 5                         | <b>102.4</b>                            | <b>130.6</b> | <b>126.2</b> | <b>122.5</b> | 30.3         | 34.1         | <b>139.9</b> |
| TLX1          | 4                         | 0.5                                     | <b>68.8</b>  | <b>34.6</b>  | <b>90.3</b>  | 11.1         | 0.5          | <b>92.6</b>  |
| TMEM64        | 2                         | 16.1                                    | <b>24.5</b>  | 5.9          | 1.6          | <b>38.2</b>  | 7.5          | 1.6          |
| TNFAIP6       | 2                         | 1.7                                     | 9.4          | <b>37.2</b>  | 0.2          | 0.9          | <b>48.0</b>  | 1.5          |
| TNFRSF10C     | 2                         | 11.5                                    | 7.0          | <b>20.1</b>  | 2.2          | 15.8         | 4.3          | <b>20.8</b>  |
| TNNT3         | 6                         | 31.4                                    | <b>539.7</b> | <b>129.7</b> | <b>49.5</b>  | <b>55.8</b>  | <b>672.9</b> | <b>149.1</b> |
| TRIM17        | 3                         | <b>21.4</b>                             | <b>22.7</b>  | 19.4         | <b>25.3</b>  | 18.6         | 14.9         | 6.8          |
| TRIM67        | 3                         | <b>74.7</b>                             | 0.0          | 0.0          | <b>48.5</b>  | 0.0          | 0.0          | <b>89.8</b>  |
| TUBA8         | 2                         | 2.8                                     | 15.9         | 5.0          | 2.6          | <b>26.8</b>  | 3.4          | <b>23.4</b>  |
| TXNDC13       | 2                         | <b>66.8</b>                             | 20.3         | 27.1         | 6.6          | 18.5         | <b>64.4</b>  | 20.3         |
| UACA          | 4                         | <b>49.1</b>                             | <b>76.9</b>  | 26.1         | <b>170.8</b> | 11.8         | <b>52.1</b>  | 33.0         |
| UBL7          | 2                         | 87.0                                    | 51.5         | 61.6         | <b>116.3</b> | 12.9         | 15.9         | <b>115.3</b> |
| UBTD2         | 2                         | 11.6                                    | 22.2         | <b>32.6</b>  | 10.2         | 25.4         | <b>94.5</b>  | 9.4          |
| UNC5B         | 2                         | 19.8                                    | 3.7          | 19.8         | 3.4          | <b>107.6</b> | <b>83.3</b>  | 2.7          |
| UNQ440        | 5                         | <b>41.8</b>                             | 16.8         | <b>24.2</b>  | <b>46.6</b>  | <b>35.5</b>  | <b>24.1</b>  | 11.3         |
| UNQ440/PRO873 | 3                         | <b>27.1</b>                             | 11.4         | 15.4         | <b>25.8</b>  | <b>25.2</b>  | 16.4         | 8.1          |
| UNQ9369       | 2                         | <b>36.3</b>                             | <b>43.5</b>  | 29.3         | 23.3         | 19.7         | 22.0         | 28.1         |
| USP53         | 2                         | 3.6                                     | 1.8          | <b>63.8</b>  | <b>67.5</b>  | 31.8         | 4.9          | 10.0         |
| VASN          | 3                         | <b>292.8</b>                            | <b>268.1</b> | 158.1        | 156.6        | 112.3        | 66.5         | <b>692.1</b> |
| VAX2          | 3                         | 15.0                                    | 3.9          | 5.3          | <b>38.4</b>  | <b>43.4</b>  | 7.2          | <b>80.9</b>  |
| VCAM1         | 3                         | 67.5                                    | 85.9         | <b>194.1</b> | 3.4          | 67.9         | <b>202.3</b> | <b>114.2</b> |
| VWCE          | 2                         | <b>31.2</b>                             | 8.1          | 13.4         | 7.7          | 11.0         | 2.2          | <b>20.3</b>  |
| WASF1         | 3                         | 14.1                                    | <b>37.0</b>  | <b>30.8</b>  | 17.5         | 7.1          | <b>25.7</b>  | 8.8          |

Supplementary Table 5. Recurrent Expression Outliers in SFT tumors (Part-6). Outliers are in bold.

| Gene    | Number of<br>Outlier<br>Samples | Gene Expression (RPKM). Bold = Outlier. |             |             |              |             |             |             |
|---------|---------------------------------|-----------------------------------------|-------------|-------------|--------------|-------------|-------------|-------------|
|         |                                 | MO_1005                                 | SFT3        | SFT18       | SFT28        | SFT31       | SFT40       | SFT44       |
| WDR19   | 2                               | <b>24.8</b>                             | 18.2        | 15.9        | <b>21.9</b>  | 12.8        | 18.9        | 13.5        |
| WHSC1L1 | 3                               | 12.1                                    | 17.8        | <b>20.3</b> | <b>21.5</b>  | <b>24.8</b> | 15.1        | 19.7        |
| WIPF3   | 2                               | 0.6                                     | 0.5         | <b>32.1</b> | 0.1          | <b>38.2</b> | 3.2         | 9.7         |
| Y19237  | 3                               | 23.7                                    | <b>36.5</b> | <b>33.2</b> | 9.3          | 11.4        | <b>49.3</b> | 8.1         |
| ZBTB7C  | 3                               | 28.4                                    | 36.8        | <b>68.0</b> | 14.1         | 24.4        | <b>75.1</b> | <b>50.9</b> |
| ZIC2    | 2                               | <b>108.4</b>                            | 0.1         | 0.0         | <b>122.0</b> | 0.4         | 0.1         | 0.9         |
| ZNF436  | 3                               | 26.0                                    | 29.7        | <b>54.6</b> | 9.8          | <b>30.0</b> | <b>47.6</b> | 21.0        |
| ZNF516  | 2                               | 8.0                                     | 18.6        | <b>22.1</b> | 6.7          | <b>31.7</b> | 15.7        | 13.5        |

**Supplementary Table 6. List of the Transcriptome-Sequencing Compendium (part-1).**

| <b>Sample ID</b> | <b>Tissue_Type</b> | <b>Status</b> | <b>Sample ID</b> | <b>Tissue_Type</b> | <b>Status</b> |
|------------------|--------------------|---------------|------------------|--------------------|---------------|
| ADR11            | Adrenal Gland      | Cancer        | BrCa10036        | Breast             | Cancer        |
| ADR13            | Adrenal Gland      | Cancer        | BrCa10037        | Breast             | Cancer        |
| BL13B            | Bladder            | Cancer        | Brst104_LN       | Breast             | Cancer        |
| BL14A            | Bladder            | Cancer        | Brst106_LN       | Breast             | Cancer        |
| BL14C            | Bladder            | Cancer        | Brst33_LN        | Breast             | Cancer        |
| BL16A            | Bladder            | Cancer        | Brst35_T         | Breast             | Cancer        |
| BL17B            | Bladder            | Cancer        | Brst36_89_N      | Breast             | Benign        |
| BL18C            | Bladder            | Cancer        | Brst37_T         | Breast             | Cancer        |
| BL18P            | Bladder            | Cancer        | Brst38_T         | Breast             | Cancer        |
| BL18Z            | Bladder            | Cancer        | Brst39_T         | Breast             | Cancer        |
| BL19B            | Bladder            | Cancer        | Brst40_T         | Breast             | Cancer        |
| BL19E            | Bladder            | Cancer        | Brst42_N         | Breast             | Benign        |
| BL1B             | Bladder            | Cancer        | Brst47_T         | Breast             | Cancer        |
| BL5B             | Bladder            | Cancer        | Brst52_100_T     | Breast             | Cancer        |
| BL7C             | Bladder            | Cancer        | Brst57_T         | Breast             | Cancer        |
| BL8B             | Bladder            | Cancer        | Brst61_LN        | Breast             | Cancer        |
| BL8D             | Bladder            | Cancer        | Brst62_T         | Breast             | Cancer        |
| ARFGEF2-SULF2-T1 | Breast             | Cancer        | Brst63_T         | Breast             | Cancer        |
| ARFGEF2-SULF2-T2 | Breast             | Cancer        | Brst66_T         | Breast             | Cancer        |
| BrBe10001        | Breast             | Benign        | Brst72_T         | Breast             | Cancer        |
| BrBe10003        | Breast             | Benign        | Brst74_LN        | Breast             | Cancer        |
| BrCa10001        | Breast             | Cancer        | Brst79_T         | Breast             | Cancer        |
| BrCa10002        | Breast             | Cancer        | Brst82_T         | Breast             | Cancer        |
| BrCa10003        | Breast             | Cancer        | Brst84_T         | Breast             | Cancer        |
| BrCa10004        | Breast             | Cancer        | Brst93_T         | Breast             | Cancer        |
| BrCa10005        | Breast             | Cancer        | Brst94_T         | Breast             | Cancer        |
| BrCa10006        | Breast             | Cancer        | Brst95_N         | Breast             | Benign        |
| BrCa10007        | Breast             | Cancer        | MCTP0484_T       | Breast             | Cancer        |
| BrCa10008        | Breast             | Cancer        | MCTP0485_T       | Breast             | Cancer        |
| BrCa10009        | Breast             | Cancer        | MCTP0486_T       | Breast             | Cancer        |
| BrCa10010        | Breast             | Cancer        | MCTP0487_T       | Breast             | Cancer        |
| BrCa10011        | Breast             | Cancer        | MCTP0488_T       | Breast             | Cancer        |
| BrCa10012        | Breast             | Cancer        | MCTP0490_T       | Breast             | Cancer        |
| BrCa10013        | Breast             | Cancer        | MCTP0491_T       | Breast             | Cancer        |
| BrCa10014        | Breast             | Cancer        | NO41B1           | Colon              | Benign        |
| BrCa10015        | Breast             | Cancer        | NO43B1           | Colon              | Benign        |
| BrCa10016        | Breast             | Cancer        | NO52B1           | Colon              | Benign        |
| BrCa10017        | Breast             | Cancer        | NO53B1           | Colon              | Benign        |
| BrCa10018        | Breast             | Cancer        | NO8B1            | Colon              | Benign        |
| BrCa10020        | Breast             | Cancer        | UCNP11B1         | Colon              | Benign        |
| BrCa10021        | Breast             | Cancer        | UCNP61B1         | Colon              | Benign        |
| BrCa10022        | Breast             | Cancer        | UCNP71B1         | Colon              | Benign        |
| BrCa10023        | Breast             | Cancer        | UCNP75B1         | Colon              | Benign        |
| BrCa10024        | Breast             | Cancer        | UCP6B2           | Colon              | Benign        |
| BrCa10025        | Breast             | Cancer        | UCP77B2          | Colon              | Benign        |
| BrCa10026        | Breast             | Cancer        | GCN-2000256      | Gastric            | Benign        |
| BrCa10027        | Breast             | Cancer        | GCN-2000521      | Gastric            | Benign        |
| BrCa10028        | Breast             | Cancer        | GCN-20020032     | Gastric            | Benign        |
| BrCa10029        | Breast             | Cancer        | GCN-970005       | Gastric            | Benign        |
| BrCa10030        | Breast             | Cancer        | GCN-980028       | Gastric            | Benign        |
| BrCa10031        | Breast             | Cancer        | GCT-2000256      | Gastric            | Cancer        |
| BrCa10032        | Breast             | Cancer        | GCT-2000521      | Gastric            | Cancer        |
| BrCa10033        | Breast             | Cancer        | GCT-20020032     | Gastric            | Cancer        |
| BrCa10034        | Breast             | Cancer        | GCT-200479       | Gastric            | Cancer        |
| BrCa10035        | Breast             | Cancer        | GCT-47149013     | Gastric            | Cancer        |

**Supplementary Table 6. List of the Transcriptome-Sequencing Compendium (part-2).**

| Sample ID            | Tissue_Type | Status | Sample ID    | Tissue_Type | Status |
|----------------------|-------------|--------|--------------|-------------|--------|
| GCT-980025           | Gastric     | Cancer | PrBe10016    | Prostate    | Benign |
| GCT-980028           | Gastric     | Cancer | PrBe10017    | Prostate    | Benign |
| GCT-76629543         | Gastric     | Cancer | PrBe10018    | Prostate    | Benign |
| GCT-970005           | Gastric     | Cancer | PrCa10001    | Prostate    | Cancer |
| GCT-980211           | Gastric     | Cancer | PrCa10002    | Prostate    | Cancer |
| GCT-980269           | Gastric     | Cancer | PrCa10003    | Prostate    | Cancer |
| GCT-990071           | Gastric     | Cancer | PrCa10004    | Prostate    | Cancer |
| Ambion_normal_lung   | Lung        | Benign | PrCa10006    | Prostate    | Cancer |
| Clontech_normal_lung | Lung        | Benign | PrCa10007    | Prostate    | Cancer |
| L26                  | Lung        | Cancer | PrCa10013    | Prostate    | Cancer |
| L33                  | Lung        | Cancer | PrCa10014    | Prostate    | Cancer |
| L36                  | Lung        | Cancer | PrCa10015    | Prostate    | Cancer |
| L39                  | Lung        | Cancer | PrCa10016    | Prostate    | Cancer |
| C41-2                | Lymphoma    | Cancer | PrCa10017    | Prostate    | Cancer |
| C60                  | Lymphoma    | Cancer | PrCa10018    | Prostate    | Cancer |
| D50                  | Lymphoma    | Cancer | PrCa10019    | Prostate    | Cancer |
| E58-1                | Lymphoma    | Cancer | PrCa10021    | Prostate    | Cancer |
| F78                  | Lymphoma    | Cancer | PrCa10023    | Prostate    | Cancer |
| G17                  | Lymphoma    | Cancer | PrCa10024    | Prostate    | Cancer |
| MeBe10001            | Melanocyte  | Benign | PrCa10025    | Prostate    | Cancer |
| MEL13                | Melanoma    | Cancer | PrCa10026    | Prostate    | Cancer |
| MEL41                | Melanoma    | Cancer | PrCa10027    | Prostate    | Cancer |
| MEL52                | Melanoma    | Cancer | PrCa10028    | Prostate    | Cancer |
| MEL56                | Melanoma    | Cancer | PrCa10029    | Prostate    | Cancer |
| MEL58                | Melanoma    | Cancer | PrCa10030    | Prostate    | Cancer |
| MEL74                | Melanoma    | Cancer | PrCa10031    | Prostate    | Cancer |
| MEL83                | Melanoma    | Cancer | PrCa10032    | Prostate    | Cancer |
| MeBe10002            | Melanoma    | Benign | PrCa10033    | Prostate    | Cancer |
| MCC-1                | Merkel      | Cancer | PrCa10034    | Prostate    | Cancer |
| MCC-2                | Merkel      | Cancer | PrCa10035    | Prostate    | Cancer |
| MCC-3                | Merkel      | Cancer | PrCa10036    | Prostate    | Cancer |
| DS13_T               | Pancreas    | Cancer | PrCa10037    | Prostate    | Cancer |
| DS15_T               | Pancreas    | Cancer | PrCa10038    | Prostate    | Cancer |
| DS18_T               | Pancreas    | Cancer | PrMe10009    | Prostate    | Cancer |
| DS416_T_xeno         | Pancreas    | Cancer | PrMe10010    | Prostate    | Cancer |
| DS420_N              | Pancreas    | Benign | PrMe10011    | Prostate    | Cancer |
| DS459_T              | Pancreas    | Cancer | PrMe10012    | Prostate    | Cancer |
| DS577_T_xeno         | Pancreas    | Cancer | TMP-aM23     | Prostate    | Cancer |
| DS597_T_xeno         | Pancreas    | Cancer | ULM2927      | Prostate    | Cancer |
| DS825_T              | Pancreas    | Cancer | ULM4340      | Prostate    | Cancer |
| DS844_T              | Pancreas    | Cancer | ULM792       | Prostate    | Cancer |
| DS848_N              | Pancreas    | Benign | ULMB11239-97 | Prostate    | Cancer |
| DSF82_T_xeno         | Pancreas    | Cancer | ULMB2440-97  | Prostate    | Cancer |
| Pen-10A_T            | Pancreas    | Cancer | aM15         | Prostate    | Cancer |
| Pen-9A_T             | Pancreas    | Cancer | aM16         | Prostate    | Cancer |
| Pen4                 | Pancreas    | Cancer | aM17         | Prostate    | Cancer |
| MCTP-0529            | Prostate    | Cancer | aM20         | Prostate    | Cancer |
| MCTP-0534            | Prostate    | Cancer | aM21         | Prostate    | Cancer |
| MDA-PCa-153-7        | Prostate    | Cancer | aM22         | Prostate    | Cancer |
| MDA-PCa-183-A        | Prostate    | Cancer | aM23         | Prostate    | Cancer |
| PrBe10002            | Prostate    | Benign | aM26         | Prostate    | Cancer |
| PrBe10003            | Prostate    | Benign | aM28         | Prostate    | Cancer |
| PrBe10013            | Prostate    | Benign | aM29         | Prostate    | Cancer |
| PrBe10014            | Prostate    | Benign | aM31         | Prostate    | Cancer |
| PrBe10015            | Prostate    | Benign | aM33         | Prostate    | Cancer |

**Supplementary Table 6. List of the Transcriptome-Sequencing Compendium (part-3).**

| <b>Sample ID</b> | <b>Tissue_Type</b> | <b>Status</b> | <b>Sample ID</b> | <b>Tissue_Type</b> | <b>Status</b> |
|------------------|--------------------|---------------|------------------|--------------------|---------------|
| aM36             | Prostate           | Cancer        | K11T             | Renal              | Cancer        |
| aM37             | Prostate           | Cancer        | K13T             | Renal              | Cancer        |
| aM38             | Prostate           | Cancer        | K14T             | Renal              | Cancer        |
| aM39             | Prostate           | Cancer        | K16T             | Renal              | Cancer        |
| aM40             | Prostate           | Cancer        | K18T             | Renal              | Cancer        |
| aM41             | Prostate           | Cancer        | K19T             | Renal              | Cancer        |
| aM44             | Prostate           | Cancer        | K20T             | Renal              | Cancer        |
| aM59             | Prostate           | Cancer        | K2T              | Renal              | Cancer        |
| aM6              | Prostate           | Cancer        | K3T              | Renal              | Cancer        |
| aM7              | Prostate           | Cancer        | K5T              | Renal              | Cancer        |
| aN10_6           | Prostate           | Benign        | K7T              | Renal              | Cancer        |
| aN11_1           | Prostate           | Benign        | K8T              | Renal              | Cancer        |
| aN13_2           | Prostate           | Benign        | AC1-T            | Salivary Gland     | Cancer        |
| aN14_4           | Prostate           | Benign        | AC3-T            | Salivary Gland     | Cancer        |
| aN15_3           | Prostate           | Benign        | ME2-T            | Salivary Gland     | Cancer        |
| aN23             | Prostate           | Benign        | ME3-T            | Salivary Gland     | Cancer        |
| aN25             | Prostate           | Benign        |                  |                    |               |
| aN27             | Prostate           | Benign        |                  |                    |               |
| aN29             | Prostate           | Benign        |                  |                    |               |
| aN31             | Prostate           | Benign        |                  |                    |               |
| aN32             | Prostate           | Benign        |                  |                    |               |
| aN33             | Prostate           | Benign        |                  |                    |               |
| aT12_4           | Prostate           | Cancer        |                  |                    |               |
| aT1_3            | Prostate           | Cancer        |                  |                    |               |
| aT20             | Prostate           | Cancer        |                  |                    |               |
| aT38             | Prostate           | Cancer        |                  |                    |               |
| aT42             | Prostate           | Cancer        |                  |                    |               |
| aT45             | Prostate           | Cancer        |                  |                    |               |
| aT47             | Prostate           | Cancer        |                  |                    |               |
| aT49             | Prostate           | Cancer        |                  |                    |               |
| aT52             | Prostate           | Cancer        |                  |                    |               |
| aT53             | Prostate           | Cancer        |                  |                    |               |
| aT54             | Prostate           | Cancer        |                  |                    |               |
| aT56             | Prostate           | Cancer        |                  |                    |               |
| aT57             | Prostate           | Cancer        |                  |                    |               |
| aT58             | Prostate           | Cancer        |                  |                    |               |
| aT5_5            | Prostate           | Cancer        |                  |                    |               |
| aT61             | Prostate           | Cancer        |                  |                    |               |
| aT62             | Prostate           | Cancer        |                  |                    |               |
| aT64             | Prostate           | Cancer        |                  |                    |               |
| aT65             | Prostate           | Cancer        |                  |                    |               |
| aT66             | Prostate           | Cancer        |                  |                    |               |
| aT67             | Prostate           | Cancer        |                  |                    |               |
| aT6_1            | Prostate           | Cancer        |                  |                    |               |
| aT76             | Prostate           | Cancer        |                  |                    |               |
| aT8_2            | Prostate           | Cancer        |                  |                    |               |

Supplementary Table 7. Sequencing statistics for SFT tumors analyzed.

| Sample         | Library Type              | Yield (Mbases) | % Reads Pass Filter | # Reads PF  | % of >= Q30 Bases (PF) | Mean Quality Score (PF) | Error Rate PhiX |
|----------------|---------------------------|----------------|---------------------|-------------|------------------------|-------------------------|-----------------|
| MO_1005 Normal | Genomic                   | 19,266         | 93.7                | 192,658,962 | 89.6                   | 34.1                    | 0.32            |
| MO_1005 Tumor  | Genomic                   | 14,501         | 95.4                | 145,006,666 | 91.8                   | 35.0                    | 0.28            |
| MO_1005 Normal | Exome (Roche EZ Exome v2) | 15,884         | 95.7                | 158,838,386 | 91.3                   | 34.9                    | 0.34            |
| MO_1005 Tumor  | Exome (Roche EZ Exome v2) | 18,913         | 94.7                | 189,130,200 | 90.8                   | 34.6                    | 0.38            |
| MO_1005 Tumor  | Transcriptome             | 17,331         | 94.5                | 173,308,880 | 89.2                   | 34.1                    | 0.14            |
| STF-3 (MSKCC)  | Transcriptome             | 21,056         | 91.0                | 210,562,550 | 90.8                   | 33.6                    | 0.36            |
| STF-18 (MSKCC) | Transcriptome             | 20,641         | 91.2                | 206,405,522 | 90.5                   | 34.0                    | 0.43            |
| STF-28 (MSKCC) | Transcriptome             | 19,035         | 92.7                | 190,346,700 | 91.7                   | 34.2                    | 0.37            |
| STF-31 (MSKCC) | Transcriptome             | 21,614         | 91.5                | 216,140,296 | 90.9                   | 33.8                    | 0.39            |
| STF-40 (MSKCC) | Transcriptome             | 18,473         | 92.7                | 184,732,802 | 90.8                   | 34.4                    | 0.41            |
| STF-44 (MSKCC) | Transcriptome             | 11,147         | 91.6                | 111,466,992 | 88.2                   | 33.5                    | 0.63            |
| UM-SFT-1       | Transcriptome             | 8,724          | 92.8                | 87,235,760  | 85.0                   | 32.2                    | 0.80            |
| UM-SFT-2       | Transcriptome             | 11,491         | 92.8                | 114,909,272 | 85.0                   | 32.6                    | 0.80            |
| UM-SFT-3       | Transcriptome             | 10,194         | 92.8                | 101,936,248 | 85.0                   | 32.0                    | 0.80            |
| UM-SFT-4       | Transcriptome             | 10,403         | 92.8                | 104,025,054 | 85.0                   | 31.9                    | 0.80            |
| UM-SFT-5       | Transcriptome             | 10,053         | 92.0                | 100,532,460 | 84.2                   | 32.3                    | 0.85            |
| UM-SFT-6       | Transcriptome             | 12,087         | 92.0                | 120,872,254 | 84.2                   | 32.1                    | 0.85            |
| UM-SFT-7       | Transcriptome             | 10,597         | 92.0                | 105,970,756 | 84.2                   | 31.5                    | 0.85            |
| UM-SFT-8       | Transcriptome             | 12,941         | 90.9                | 129,409,894 | 88.2                   | 32.9                    | 0.69            |
| UM-SFT-9       | Transcriptome             | 12,746         | 90.9                | 151,738,538 | 89.2                   | 34.3                    | 0.83            |
| UM-SFT-10      | Transcriptome             | 10,682         | 92.1                | 127,161,984 | 89.4                   | 34.1                    | 1.18            |
| UM-SFT-11      | Transcriptome             | 12,335         | 93.0                | 146,841,784 | 89.5                   | 34.1                    | 1.29            |
| UM-SFT-12      | Transcriptome             | 12,532         | 93.0                | 149,187,386 | 89.5                   | 34.2                    | 1.29            |
| UM-SFT-13      | Transcriptome             | 11,326         | 93.0                | 134,828,390 | 89.5                   | 34.3                    | 1.29            |
| UM-SFT-14      | Transcriptome             | 11,656         | 89.6                | 138,764,520 | 89.0                   | 33.9                    | 1.02            |
| UM-SFT-15      | Transcriptome             | 10,437         | 89.6                | 124,254,778 | 89.0                   | 33.5                    | 1.02            |
| UM-SFT-16      | Transcriptome             | 11,002         | 92.5                | 130,973,398 | 89.0                   | 33.9                    | 1.14            |
| UM-SFT-17      | Transcriptome             | 11,484         | 92.5                | 136,711,022 | 89.0                   | 33.9                    | 1.14            |
| UM-SFT-18      | Transcriptome             | 14,416         | 91.1                | 144,164,630 | 88.6                   | 33.5                    | 0.65            |
| UM-SFT-19      | Transcriptome             | 12,905         | 91.1                | 129,047,456 | 88.6                   | 33.2                    | 0.65            |
| UM-SFT-20      | Transcriptome             | 15,174         | 90.9                | 151,738,538 | 88.2                   | 33.5                    | 0.69            |



**Supplementary Table 8. Primer sequences.**

**Cloning of MO\_1005 NAB2-STAT6 fusion allele**

|                    |                                           |
|--------------------|-------------------------------------------|
| NAB2 FL-S1         | CAACGGTCCGACCATGCACAGAGCGCCTTCC           |
| NAB2_STAT6 JUNC-AS | CCTTACCCATCTGTTACAGCTGCGAGAGGTGGCTTCGCAGG |
| NAB2_STAT6 JUNC-S  | AAGCCACCTCTCGCAGCTGAACAGATGGGTAAGGATGGCA  |
| STAT6 FL-AS        | CAACGGACCGCAAGTGTCCAGAGCAGGTCTG           |
| NAB2-RT1           | CCTCAGCCTCCACTTTACCG                      |
| STAT6-RT1          | CAGGGGAATGATAGAAAGGAA                     |

**Sequencing primers**

|         |                          |
|---------|--------------------------|
| NAB2-P1 | GTACGCATGGTGGTGGAAAGTGTG |
| NAB2-P2 | GGGATGCTGGGGAGGTCACATC   |

**Quantitative RT-PCR primers**

|                    |                           |
|--------------------|---------------------------|
| NAB2STAT6 QFUS-S2  | GCTATGGAGCCGACACATCCTG    |
| NAB2STAT6 QFUS-AS2 | GGAAGTGGTTGGTCCCTTTCCA    |
| NAB2STAT6 SFT31-S  | TGCAGCAGACACTGATGGACGAG   |
| NAB2STAT6 SFT31-AS | TCTCCAGCCAGTACCCAGAAGA    |
| NAB2STAT6 SFT40-S  | CCCTCCACTGAAGAAGCTGAAACAA |
| NAB2STAT6 SFT40-AS | CACTAGCCAAGTTGCAGCAGAAGG  |
| IGF2 QPCR_S1       | ACCTGGCCCTCCTGGAGACG      |
| IGF2 QPCR_AS1      | GGGGAAGTTGTCCGGAAGCACG    |
| RRAD QPCR_S1       | GCGGCGGGCGAAACCCTAAA      |
| RRAD QPCR_AS1      | CGGGACCGTCCACTCGCACA      |
| H19 QPCR_S1        | GTAGGCGCCAGGCATCGTG       |
| H19 QPCR_AS1       | TCCAACCAGCTGCCACGTCC      |
| NAB2ex5 Forward    | CCTGTCTGGGGAGAGTCTGGATG   |
| STAT6ex20 Reverse  | GGGGGGATGGAGTGAGAGTGTG    |
| STAT6 Ex13F        | GCCTTCCAGCACCGTTCTGTGTC   |
| NAB2 Ex7R          | GAGAGCGTGGGGGTCTGTGTG     |
| STAT6 Ex1F         | TGGTGGTGGTGGTGGAAAGG      |
| NAB2 Ex7R          | GAGAGCGTGGGGGTCTGTGTG     |

**Long-range genomic PCR primers**

|                   |                         |
|-------------------|-------------------------|
| NAB2STAT6 GEN-S1  | TGTGGGGTCATGTCCAAGGCT   |
| NAB2STAT6 GEN-AS1 | CGGTCATCTTGATGGTAGCTGGG |

**ChIP PCR primers**

|               |                        |
|---------------|------------------------|
| NAB1-ChIP-F7  | GTGGGCGGGAAGAAGCG      |
| NAB1-ChIP-R7  | GGACTGCTCAGCCCCAAC     |
| NAB2-ChIP-F2  | TTCCGGACTAGGGGAAACCT   |
| NAB2-ChIP-R2  | GAGCCTACGACGTGACTTCC   |
| NAB2-ChIP-1S  | TCGCTCCCTGTGCGTCCTG    |
| NAB2-ChIP-1AS | CTGTCCCTCCCTCCACGTCTTC |
| TGFB1-ChIP-F3 | AAAGCGGGTGATCCAGATGC   |
| TGFB1-ChIP-R3 | TTCCCAGCCTGACTCTCCTT   |
| CEBPA-ChIP-F5 | GCCCACGTGGTCCGGTAG     |
| CEBPA-ChIP-R5 | CTCAAGACCAAGACTCGCCC   |
| CASP9-ChIP-F1 | GTCAGTCTTCGCTCCCCAC    |
| CASP9-ChIP-R1 | ACGCAGTGGTGGATTCTGG    |
| CASP9-ChIP-F7 | AGGGAAACCATGAGTGGAGC   |
| CASP9-ChIP-R7 | GTAAGGTGGGCTTGGTTGGA   |

**STAT6 pGL4 reporter primers**

|               |                                                                  |
|---------------|------------------------------------------------------------------|
| STAT6 pGL4-S  | AGTATTTTCAGAGAAAACACTTCATGGAAGACACTTCCAGAGAAGACATTTCTAGAAAACACGG |
| STAT6 pGL4-AS | TGTTTTCTAGGAAATGTCTTCTCTGGAAGTGTCTTCCATGAAGTGTCTTCTGAAATACTGTT   |
